1 **Nematode germ granule assembly is linked to mRNA repression**

2

3 Scott Takeo Aoki<sup>1</sup>, Sarah L Crittenden<sup>1,2</sup>, Tina R Lynch<sup>1</sup>, Craig A Bingman<sup>1</sup>, Marvin Wickens<sup>1</sup>,

4 Judith Kimble<sup>1,2,\*</sup>

5

6 <sup>1</sup> Department of Biochemistry and <sup>2</sup>Howard Hughes Medical Institute, University of Wisconsin-

7 Madison, Madison, WI, USA

8

9 \* For correspondence:

10 Judith Kimble

11 HHMI/Department of Biochemistry

12 University of Wisconsin-Madison

13 433 Babcock Drive

14 Madison, WI 53706-1544

15 Tel 608-262-6188

16 Fax 608-265-5820

17 [jekimble@wisc.edu](mailto:jekimble@wisc.edu)

18

19 Keywords: RNA-protein granule, germ granule, scaffold protein

20

21 Abbreviations: RNA, ribonucleic acid; UTR, untranslated region; GFP, green fluorescent

22 protein; CRISPR, Clustered Regularly Interspaced Short Palindromic Repeats

23

24

25

## 26 **Summary**

27 RNA-protein (RNP) granules are non-membrane bound organelles with enigmatic roles in RNA  
28 metabolism. Metazoa contain RNP “germ granules” specialized for germline development.  
29 *Caenorhabditis elegans* P-granules are liquid droplet germ granules that require PGL proteins  
30 for assembly. Here we investigate PGL proteins to understand the relationship between P-  
31 granule assembly and germline function. We determine the crystal structure of a PGL N-  
32 terminal domain (NTD) and find that it dimerizes. From the structure, we identify mutations that  
33 disrupt PGL dimerization *in vitro* and prevent PGL granule formation in mammalian cells in  
34 culture. These same mutations in nematodes prevent assembly of PGL into P-granules and  
35 cause sterility. Using a protein-mRNA tethering assay, we show that mRNAs recruited to PGL-1  
36 are repressed, while mRNAs recruited to PGL-1 mutants defective for granule assembly are  
37 expressed. Therefore, the effects of PGL on mRNA repression and fertility are tightly linked to  
38 its formation of higher-ordered assemblies.

39

## 40 **Introduction**

41 Subcellular localization can be critical for RNA control. The locations of RNAs and RNA  
42 regulatory proteins within a cell can dictate whether RNAs are translated or repressed (Singh et  
43 al., 2015). RNA-protein (RNP) granules are non-membrane bound “organelles” found  
44 ubiquitously in cells. These granules can be relatively inert, with little exchange of components  
45 between the granules and their environment, or they can behave as liquid droplets, with  
46 components capable of freely diffusing between the granule and cytoplasm (Hyman et al., 2014;  
47 Wu and Fuxreiter, 2016). RNP granules contain factors that regulate mRNA turnover,  
48 sequestration and translation and have been proposed to function in mRNA regulation (Buchan,  
49 2014). Yet despite intense interest, the connection between granule assembly and biological  
50 function is poorly understood.

51

52 Metazoan germ cells contain specialized RNP germ granules with functions in RNA metabolism  
53 and small regulatory RNA biogenesis (Voronina et al., 2011). *Caenorhabditis elegans* germ  
54 granules, called P-granules, are necessary for adult germ cell maintenance and totipotency  
55 (Strome and Updike, 2015). P-granules display liquid droplet behavior (Brangwynne et al.,  
56 2009) and have similarities in subcellular location and composition to germ granules in  
57 *Drosophila* and vertebrates (Voronina et al., 2011). In adult germ cells (**Figure 1A**), P-granules  
58 localize to the cytoplasmic face of nuclear pores and contain mRNAs and proteins involved in  
59 RNA metabolism (Updike and Strome, 2010). Yet the molecular function of P-granules is poorly  
60 defined. One suggested role has been mRNA repression. This idea is based on localization of  
61 repressed mRNAs to P-granules (Schisa et al., 2001) and upregulation of aberrant transcript  
62 expression when P-granules are lost (Campbell and Updike, 2015; Knutson et al., 2017; Updike  
63 et al., 2014). Because these lines of evidence are indirect and based on gene knockouts of  
64 major P-granule assembly proteins, it remains unclear whether transcript repression depends  
65 on P-granule components or their assembly into granules.

66  
67 P-granule formation relies on key assembly proteins. Crucially important are the PGL-1 and  
68 PGL-3 proteins (Kawasaki et al., 2004; Kawasaki et al., 1998), close paralogs we henceforth  
69 refer to as PGL. PGL protein contains a central dimerization domain (DD) and C-terminal low  
70 complexity RGG repeats (**Figure 1B**) (Aoki et al., 2016; Kawasaki et al., 2004; Kawasaki et al.,  
71 1998). Genetic removal of PGL causes mislocalization of P-granule proteins (Amiri et al., 2001),  
72 aberrant expression of spermatogenic and somatic mRNAs (Campbell and Updike, 2015;  
73 Knutson et al., 2017; Updike et al., 2014), and temperature-dependent sterility (Kawasaki et al.,  
74 2004; Kawasaki et al., 1998). PGL proteins self assemble into granules, both *in vitro* using  
75 purified recombinant protein (Saha et al., 2016), and in intestinal nematode cells or mammalian  
76 cells in culture when expressed on their own (Hanazawa et al., 2011; Updike et al., 2011).  
77 These artificial PGL granules display liquid droplet behavior (Saha et al., 2016), indicating that

78 PGL protein alone is sufficient to recapitulate the biophysical properties of P-granules in  
79 nematode cells (Brangwynne et al., 2009). Many RNP granule assembly proteins rely on low  
80 complexity sequences for low affinity, multivalent interactions (Banani et al., 2017). PGL lacks  
81 large regions of low complexity, with the exception of its C-terminal RGG repeats that are not  
82 necessary for granule formation (Hanazawa et al., 2011; Saha et al., 2016). The central DD  
83 domain can dimerize (Aoki et al., 2016), but higher ordered assembly demands additional  
84 protein contacts.

85

86 P-granules serve as a paradigm for RNP granules with liquid droplet properties. We have  
87 investigated the PGL assembly protein to understand PGL multimerization into a granule and to  
88 probe the relationship between granule formation and its biological function. We determined the  
89 structure of the PGL N-terminal domain (NTD), found that it dimerizes and identified amino  
90 acids required for NTD dimerization that are also required for PGL assembly into granules *in*  
91 *vitro*, in mammalian culture cells and germ cells in living nematodes. Indeed, PGL  
92 multimerization is critical for nematode fertility. Using a protein-mRNA tethering assay in living  
93 nematodes, we show that reporter mRNAs recruited to PGL are repressed, and that their  
94 repression requires PGL assembly into granules. This study therefore provides direct *in vivo*  
95 evidence that RNP granule formation is linked to mRNA repression.

96

## 97 **Results**

### 98 **Structure determination of a second PGL dimerization domain**

99 Granule formation is driven by multimer-multimer interactions (Bergeron-Sandoval et al., 2016).  
100 The central PGL DD provides one multimerization site (Aoki et al., 2016), but since PGL protein  
101 alone can form granules (Hanazawa et al., 2011; Saha et al., 2016), we postulated the  
102 existence of another PGL multimerization region critical for granule assembly. The region N-  
103 terminal to DD (**Figure 1B**) had high sequence conservation (**Figure S1A**), implying a critical

104 role in PGL function. Our initial efforts to express trypsin-mapped recombinant protein fragments  
105 of this N-terminal region proved unfruitful. However, we had noticed that the original DD N-  
106 termini were disordered in crystal structures (Aoki et al., 2016). When the N-terminal  
107 recombinant protein was extended to include these disordered residues (**Figure S1A**), we  
108 obtained robust expression sufficient for biochemical and structural characterization (**Figure**  
109 **S2A-B**). Henceforth, we refer to this stable protein fragment as the N-terminal domain (NTD)  
110 (**Figure 1B**).

111  
112 We determined the *C. japonica* PGL-1 NTD crystal structure to 1.5 Å (**Figure 1C-D**, see **Table**  
113 **S1** for statistics, see Methods for further details on crystallization and structure determination).  
114 The NTD had a novel fold consisting of 11 alpha helices and a single N-terminal beta strand  
115 (**Figure 1D**). The crystal asymmetric unit (ASU) was composed of four NTD domains (**Figure**  
116 **1C**). These four NTDs were structurally similar (RMSD 0.219 - 0.254, chains B-D aligned to A),  
117 except for minor differences in their termini and internal loops. More relevant, they possessed  
118 two pairs of identical interfaces (**Figure 1C**). One of these interface pairs consisted of a network  
119 of conserved amino acid side chains making extensive salt bridges and hydrogen bonds  
120 (**Figures 2A-C and S2C-E**). The complexity and conservation of these interactions suggested  
121 biological relevance. We first tested for dimerization *in vitro*. Recombinant PGL-3 NTD formed a  
122 dimer on a sizing column combined with multi-angle light scattering (SEC-MALS, **Figure 2D-E**).  
123 We postulated that the conserved interface in the NTD crystal structure might be its dimerization  
124 interface. To test that idea, we used our structural model and *in silico* prediction (Kortemme et  
125 al., 2004) to design missense mutations that disrupt the interface. These analyses yielded two  
126 distinct mutants: K126E K129E with two mutated residues and R123E with a single mutated  
127 residue. Both NTD mutants formed monomers rather than dimers in solution (**Figure 2D-E**). We  
128 conclude that the dimers observed in the crystal structure represent the NTD dimer detected in  
129 solution.

130

### 131 **PGL NTD dimerization is critical for granule formation**

132 To assess the role of NTD dimerization in PGL granule self-assembly, we first turned to an  
133 assay in mammalian cells where PGL expressed alone assembles into granules (Hanazawa et  
134 al., 2011). Similar to that report, GFP-tagged PGL-1 formed large cytoplasmic granules in cells  
135 (**Figure 2F-G**), while GFP alone was diffuse (**Figure 2H**). However, if we mutated the GFP-  
136 tagged PGL-1 to either K126E K129E or R123E, PGL-1 no longer formed granules (**Figure 2I-  
137 J**). We conclude that NTD dimerization is essential for self-assembly of PGL granules in  
138 mammalian cells.

139

140 We next asked whether NTD dimerization was essential for PGL function and granule assembly  
141 in the nematode germline. We inserted a SNAP tag (Keppler et al., 2003) using CRISPR gene  
142 editing (Paix et al., 2015) at the endogenous *pgl-1* locus (**Figure 3A and S1B**). Wild-type PGL-1  
143 (N2) and PGL-1::SNAP were similarly fertile at 20°C and 25°C (**Figure 3B**); in contrast, a *pgl-1*  
144 null mutant was mostly sterile at 25°C (**Figure 3B**), as reported previously (Kawasaki et al.,  
145 2004; Kawasaki et al., 1998). SNAP-tagged PGL-1 permitted visualization of the protein with  
146 essentially no background (**Figure 3C-D**). PGL-1::SNAP assembled into cytoplasmic granules  
147 at the nuclear periphery (**Figure 3D**), similar to those seen with antibody staining to untagged  
148 PGL-1 and PGL-3 (Kawasaki et al., 2004; Kawasaki et al., 1998). The SNAP-tagged protein  
149 therefore provides a simple way to evaluate PGL assembly into granules.

150

151 To probe the role of PGL NTD dimerization in the nematode germline, we introduced the  
152 assembly mutants into PGL-1::SNAP (**Figure S1B**) and assayed effects on fertility and granule  
153 formation. For both K126E K129E and R123E mutants, many were sterile at 20°C and nearly all  
154 were sterile at 25°C (**Figure 3B**). Indeed, the percentage of sterile animals was higher than  
155 seen in a *pgl-1* null mutant (**Figure 3B**), suggesting that abolishing NTD dimerization had a

156 dominant-negative effect. Both interface mutants had smaller than normal germlines and many  
157 lacked oocytes (**Figure S3B-D**), similar to *pgl-1* and *pgl-1 pgl-3* null mutant germlines  
158 (Kawasaki et al., 2004; Kawasaki et al., 1998). We next examined expression and localization of  
159 mutant SNAP-tagged PGL-1 proteins, in both fertile (**Figure 3**) and sterile germlines (**Figure**  
160 **S3**). Both K126E K129E and R123E mutant proteins were expressed, but their distribution was  
161 largely diffuse (**Figures 3E-F and S3F-G**). The mutant proteins did form small perinuclear  
162 granules in some germ cells of all gonads imaged (**Figure 3E-F and S3F-G**), and for each  
163 mutant we found a single germline (1/59 for K126E K129E; 1/54 for R123E) with small PGL-1  
164 perinuclear granules in all germ cells (**Figure S3H-I**). Therefore, both PGL-1 mutant proteins are  
165 capable of incorporating into P-granules, but do so much more weakly than their wild-type  
166 counterparts (**Figure 3D**). We conclude that PGL NTD dimerization is critical for fertility and  
167 efficient PGL granule formation.

168  
169 We wondered why sterility of PGL-1 NTD dimerization mutants was more severe than that of a  
170 *pgl-1* null mutant. One plausible explanation was interference with assembly of other P-granule  
171 components into granules, which might yield dominant-negative effects. Normally, PGL-1  
172 interacts with PGL-3 (Kawasaki et al., 2004), and both PGL-1 and PGL-3 rely on GLH-1 or GLH-  
173 4 Vasa helicases to localize to the nuclear periphery (Spike et al., 2008; Updike et al., 2011). In  
174 contrast, GLH proteins assemble at the nuclear pore independently of PGLs (Kawasaki et al.,  
175 2004; Kawasaki et al., 1998; Kuznicki et al., 2000). We postulated that PGL-1 assembly mutants  
176 might interfere with assembly of PGL-3 into granules but not affect GLH-1 localization. To test  
177 this idea, we epitope-tagged endogenous *pgl-3* and *glh-1* (see Methods) and compared  
178 localization of PGL-3::V5 and GLH-1::Myc in germ cells expressing wild type PGL-1::SNAP or  
179 mutant PGL-1::SNAP K126E K129E. With wild-type PGL-1::SNAP, all three proteins, PGL-1,  
180 PGL-3 and GLH-1, co-localized in granules at the nuclear periphery (**Figure 3G-K**), as  
181 previously observed for untagged proteins (Kawasaki et al., 2004; Kuznicki et al., 2000).

182 However, with mutant PGL-1::SNAP, the wild-type PGL-3 protein became diffuse with  
183 occasional small perinuclear granules, a distribution similar to PGL-1 mutant protein (**Figure 3L-**  
184 **N**). By contrast, GLH-1 localized at the nuclear periphery independent of PGL-1 or PGL-3  
185 (**Figure 3O-P**). Therefore, the PGL-1 assembly mutant affected PGL-3 assembly and  
186 incorporation into P-granules, but it did not abolish GLH-1 localization. Because the percent  
187 sterility of PGL-1 K126E K129E mutants was similar to that of *pgl-1 pgl-3* double null mutants  
188 (Kawasaki et al., 2004), we suggest that the severe sterility of PGL-1 NTD mutants results from  
189 effects on both PGL-1 and PGL-3 assembly into granules.

190

### 191 **Granular PGL represses mRNAs *in vivo***

192 Prior studies have suggested that P-granules regulate mRNA expression (see Introduction). To  
193 directly test whether P-granules can regulate mRNAs, we relied on a protein-mRNA tethering  
194 assay, widely used to investigate RNA regulatory proteins (Baron-Benhamou et al., 2004; Coller  
195 and Wickens, 2002). Our assay examined the fate of mRNAs to which PGL-1 was tethered via  
196  $\lambda$ N22, a short peptide that binds with high affinity and sequence specificity to the boxB RNA  
197 hairpin (Baron-Benhamou et al., 2004). Versions of this method were used previously in worms  
198 and other organisms (Baron-Benhamou et al., 2004; Wedeles et al., 2013). For the reporter, we  
199 inserted three boxB sites into the 3'UTR of a ubiquitously-expressed, germline GFP-histone  
200 reporter (**Figure 4A**, Methods) (Zeiser et al., 2011). To tether PGL to the GFP reporter mRNA,  
201 we inserted the  $\lambda$ N22 peptide sequence into our PGL-1::SNAP protein (**Figures 4A** and **S1B**,  
202 Methods). Addition of  $\lambda$ N22 to PGL-1 rendered homozygous worms sterile (0% fertile, n=94),  
203 but the  $\lambda$ N22-tagged *pgl-1* gene could be maintained and tested as a fertile heterozygote (PGL-  
204 1::SNAP:: $\lambda$ N22/+). The logic of our strategy is simple: if tethered wild-type PGL-1 represses  
205 GFP expression, we can then test assembly-defective PGL-1 to ask if repression relies on  
206 granule formation (**Figure 4A**).

207



208 We assayed reporter expression in both living animals and fixed, extruded gonads. In living  
209 animals harboring both reporter and PGL-1::SNAP without  $\lambda$ N22, GFP was expressed robustly  
210 (**Figures 4B**), but in those with both reporter and PGL-1::SNAP:: $\lambda$ N22, GFP was absent (**Figure**  
211 **4C**). When fixed, control germlines expressed GFP robustly (**Figure 4E**), but those with PGL-  
212 SNAP:: $\lambda$ N22 had either no detectable GFP (**Figure 4F**) or extremely faint GFP (2/39 germline).  
213 The wild-type PGL-1::SNAP:: $\lambda$ N22 formed perinuclear granules (**Figure 4E-F**), though the  
214 SNAP signal was lower, perhaps because animals were heterozygous. Regardless, the key  
215 conclusion is that PGL-1 tethering dramatically decreased GFP expression from the mRNA  
216 reporter.

217  
218 One possible explanation for loss of GFP expression might have been germline silencing, a  
219 phenomenon common for genes expressing foreign proteins and thought to prevent deleterious  
220 mRNAs from entering the cytoplasm (Hoogstrate et al., 2014). To ask if the reporter had been  
221 silenced, we used single molecule fluorescence *in situ* hybridization (smFISH) to detect *gfp*  
222 RNAs. Control germ cells harboring PGL-1::SNAP without  $\lambda$ N22 (**Figure S4A-D**) possessed  
223 nuclear and cytoplasmic puncta (**Figure S4D**). We interpret the nuclear puncta as active  
224 transcription sites and cytoplasmic puncta as mRNAs, based on a previous study (Lee et al.,  
225 2016). In these control germ cells, GFP protein fluorescence was robust (**Figure S4B**), and  
226 PGL-1::SNAP localized to perinuclear granules (**Figure S4C**). Germ cells harboring PGL-  
227 1::SNAP:: $\lambda$ N22 (**Figure S4E-H,M**) also possessed nuclear and cytoplasmic puncta (**Figure**  
228 **S4H,M**), but cytoplasmic puncta were fewer and frequently colocalized with P-granules (**Figure**  
229 **S4G-H,M**). These germ cells possessed *gfp* reporter transcripts and thus were not subject to  
230 germline silencing. However, they had no GFP protein expression, indicating that reporter  
231 expression was repressed by PGL-1 tethering.

232

233 Our structural insight into PGL provided an opportunity to test how PGL granule formation  
234 affected its ability to repress mRNAs. We introduced K126E K129E into PGL-1::SNAP:: $\Delta$ N22 to  
235 prevent robust granule assembly (**Figure S1B**). Mutant homozygotes had modest fertility (21%  
236 fertile, n=96) that was comparable to other NTD mutant worms (**Figure 3B**). Dimerization-  
237 defective PGL-1 failed to repress the reporter RNA to which it was tethered: most germ cells  
238 expressed GFP, both in living worms (**Figure 4D**) and fixed gonads (**Figure 4G**). The PGL-1  
239 mutant protein was diffuse and non-granular (**Figure 4G**), as expected. By smFISH for gfp  
240 reporter RNA, germ cells with mutant PGL-1::SNAP:: $\Delta$ N22 had large puncta in their nuclei and  
241 small puncta throughout their cytoplasm (**Figure S4I-L**), similar to gonads expressing PGL-  
242 1::SNAP without  $\Delta$ N22 (**Figure S4A-D**). Formally, the PGL-1 interface residue mutations might  
243 affect granule assembly and mRNA repression independently. However, the simplest  
244 explanation is that PGL-1 must assemble into granules for mRNA repression.

245

## 246 **Discussion**

247 P-granules are paradigmatic liquid droplet RNP granules and have been predicted to be sites of  
248 mRNA repression. This idea was based on several observations. Repressed mRNAs appear  
249 trapped in P-granules (Schisa et al., 2001); P-granules are necessary to repress aberrant  
250 expression of spermatogenic and somatic transcripts (Campbell and Updike, 2015; Knutson et  
251 al., 2017; Updike et al., 2014); and P-granule components include inhibitory RNA binding  
252 proteins, like the Pumilio homolog, FBF-2 (Voronina et al., 2012) and RNA regulatory enzymes,  
253 like the Argonaut/Piwi PRG-1 (Batista et al., 2008) and the deadenylase PARN-1 (Tang et al.,  
254 2016). In this work, we report the discovery of PGL NTD dimerization and demonstrate that PGL  
255 NTD dimerization is critical for granule formation, fertility and mRNA repression *in vivo*. Based  
256 on these results, we propose that mRNAs in P-granules are repressed and that this repression  
257 requires PGL assembly into granules (**Figure 4H**). PGL contains two dimerization domains (this  
258 work; Aoki et al., 2016), but mutations disrupting DD dimerization have been elusive. A critical

259 future direction is to investigate how each dimerization domain contributes to higher order and  
260 likely oligomeric assembly.

261

262 Granule assembly proteins form a structural network that relies on multivalency and low affinity  
263 interactions for plasticity (Bergeron-Sandoval et al., 2016). We have discovered that PGL uses  
264 at least one dimerization domain to form granules, but our results do not address the low affinity  
265 interactions that must be present to drive liquid droplet behavior. Critical granule assembly  
266 proteins have been identified for several RNP granules. Examples include Oskar and Vasa for  
267 *Drosophila* polar granules (Breitwieser et al., 1996; Markussen et al., 1995; Vanzo and  
268 Ephrussi, 2002), EDC3 and LSM4 for P-bodies (Decker et al., 2007), and MEG-3 and MEG-4  
269 for embryonic P-granules (Wang et al., 2014). These examples rely on a combination of  
270 multimerization domains and low complexity, intrinsically disordered sequences to facilitate  
271 granule formation (Decker et al., 2007; Jeske et al., 2015; Ling et al., 2008; Nott et al., 2015;  
272 Wang et al., 2014). We suggest that PGL also makes low affinity contacts that work with its  
273 dimerization interfaces to facilitate granule formation. Recombinant PGL proteins make granules  
274 on their own *in vitro* (Saha et al., 2016), suggesting that PGL has low affinity contacts in the full-  
275 length protein. RGG repeats facilitate granule formation in other assembly proteins (Nott et al.,  
276 2015), but PGL did not require its RGG repeats to form granules in mammalian cell culture  
277 (Hanazawa et al., 2011). The RGG repeats may instead be needed to trigger robust granule  
278 assembly with RNA (Saha et al., 2016) or impart liquid droplet properties associated with PGL in  
279 nematodes (Brangwynne et al., 2009).

280

281 Our study provides direct evidence that recruiting mRNAs to a liquid droplet RNP granule  
282 represses their expression. The mechanism of repression remains unclear. P-granule  
283 components include RNA turnover enzymes and translation inhibitory proteins (Updike and  
284 Strome, 2010) that may repress PGL-tethered mRNAs directly. Alternatively, tethered mRNAs

285 may be trapped within granules by avidity to high PGL concentrations, blocking their access to  
286 translational machinery. Regardless, this work adds to the emerging theme that granules play a  
287 general role in repression. Liquid droplet stress granules sequester the mTORC1 protein  
288 complex to block activation of mTOR signaling (Wippich et al., 2013). Mammalian cells can trap  
289 hormones and melanin in amyloid-like aggregates to prevent signaling (Fowler et al., 2006; Maji  
290 et al., 2009). RNP granules have also been proposed to repress mRNAs. mRNA repressors are  
291 found in RNP granules (e.g. DDX6/Dhh1, Decker and Parker, 2012) but their repressive  
292 activities can function independently of granules (Carroll et al., 2011). Granule formation of a  
293 yeast amyloid-like RNA binding protein correlates with translational inhibition of transcripts  
294 critical for gametogenesis (Berchowitz et al., 2015), and P-bodies contain mRNAs that are  
295 translationally repressed in cells (Hubstenberger et al., 2017). Further studies that pair insights  
296 into mechanisms of granule assembly with direct *in vivo* assays of regulation will be pivotal  
297 moving forward to decipher the mechanistic function of other RNP granules in their natural  
298 biological context.

299

### 300 **Acknowledgements**

301 The authors thank M. Cox for equipment; J. Claycomb for plasmids and strains; T. Hoang, S.  
302 Strome, D. Updike, and members of the Kimble and Wickens labs for helpful discussions. Use  
303 of the LS-CAT Sector 21 was supported by the Michigan Economic Development Corporation  
304 and the Michigan Technology Tri-Corridor (Grant 085P1000817). The Keck Biophysics Facility  
305 (SEC-MALS) is supported in part by NCI CCSG P30 CA060553 grant awarded to the Robert H  
306 Lurie Comprehensive Cancer Center. STA was supported by K99HD081208. CAB was  
307 supported by NIH grants GM094584, GM094622 and GM098248. MW was supported by NIH  
308 grant GM50942. JK is an Investigator of the Howard Hughes Medical Institute.

309

310 **References**

- 311 Amiri, A., Keiper, B.D., Kawasaki, I., Fan, Y., Kohara, Y., Rhoads, R.E., and Strome, S.  
312 (2001). An isoform of eIF4E is a component of germ granules and is required for  
313 spermatogenesis in *C. elegans*. *Development* *128*, 3899-3912.
- 314 Aoki, S.T., Kershner, A.M., Bingman, C.A., Wickens, M., and Kimble, J. (2016). PGL germ  
315 granule assembly protein is a base-specific, single-stranded RNase. *Proc. Natl. Acad. Sci. USA*  
316 *113*, 1279-1284.
- 317 Banani, S.F., Lee, H.O., Hyman, A.A., and Rosen, M.K. (2017). Biomolecular condensates:  
318 organizers of cellular biochemistry. *Nat. Rev. Mol. Cell Biol.* *18*, 285-298.
- 319 Baron-Benhamou, J., Gehring, N.H., Kulozik, A.E., and Hentze, M.W. (2004). Using the  $\lambda$ N  
320 peptide to tether proteins to RNAs. *Methods Mol. Biol.* *257*, 135-154.
- 321 Batista, P.J., Ruby, J.G., Claycomb, J.M., Chiang, R., Fahlgren, N., Kasschau, K.D., Chaves,  
322 D.A., Gu, W., Vasale, J.J., Duan, S., *et al.* (2008). PRG-1 and 21U-RNAs interact to form the  
323 piRNA complex required for fertility in *C. elegans*. *Mol. Cell* *31*, 67-78.
- 324 Berchowitz, L.E., Kabachinski, G., Walker, M.R., Carlile, T.M., Gilbert, W.V., Schwartz, T.U.,  
325 and Amon, A. (2015). Regulated formation of an amyloid-like translational repressor governs  
326 gametogenesis. *Cell* *163*, 406-418.
- 327 Bergeron-Sandoval, L.P., Safaee, N., and Michnick, S.W. (2016). Mechanisms and  
328 consequences of macromolecular phase separation. *Cell* *165*, 1067-1079.
- 329 Brangwynne, C.P., Eckmann, C.R., Courson, D.S., Rybarska, A., Hoege, C., Gharakhani, J.,  
330 Julicher, F., and Hyman, A.A. (2009). Germline P granules are liquid droplets that localize by  
331 controlled dissolution/condensation. *Science* *324*, 1729-1732.
- 332 Breitwieser, W., Markussen, F.H., Horstmann, H., and Ephrussi, A. (1996). Oskar protein  
333 interaction with Vasa represents an essential step in polar granule assembly. *Genes Dev.* *10*,  
334 2179-2188.

- 335 Buchan, J.R. (2014). mRNP granules. Assembly, function, and connections with disease.  
336 RNA Biol 11, 1019-1030.
- 337 Campbell, A.C., and Updike, D.L. (2015). CSR-1 and P granules suppress sperm-specific  
338 transcription in the *C. elegans* germline. Development 142, 1745-1755.
- 339 Carroll, J.S., Munchel, S.E., and Weis, K. (2011). The DExD/H box ATPase Dhh1 functions  
340 in translational repression, mRNA decay, and processing body dynamics. J. Cell Biol. 194, 527-  
341 537.
- 342 Coller, J., and Wickens, M. (2002). Tethered function assays using 3' untranslated regions.  
343 Methods 26, 142-150.
- 344 Decker, C.J., and Parker, R. (2012). P-bodies and stress granules: possible roles in the  
345 control of translation and mRNA degradation. Cold Spring Harb Perspect Biol 4, a012286.
- 346 Decker, C.J., Teixeira, D., and Parker, R. (2007). Edc3p and a glutamine/asparagine-rich  
347 domain of Lsm4p function in processing body assembly in *Saccharomyces cerevisiae*. J. Cell  
348 Biol. 179, 437-449.
- 349 Fowler, D.M., Koulov, A.V., Alory-Jost, C., Marks, M.S., Balch, W.E., and Kelly, J.W. (2006).  
350 Functional amyloid formation within mammalian tissue. PLoS Biol. 4, e6.
- 351 Hanazawa, M., Yonetani, M., and Sugimoto, A. (2011). PGL proteins self associate and bind  
352 RNPs to mediate germ granule assembly in *C. elegans*. J. Cell Biol. 192, 929-937.
- 353 Hoogstrate, S.W., Volkers, R.J., Sterken, M.G., Kammenga, J.E., and Snoek, L.B. (2014).  
354 Nematode endogenous small RNA pathways. Worm 3, e28234.
- 355 Hubstenberger, A., Courel, M., Benard, M., Souquere, S., Ernoult-Lange, M., Chouaib, R., Yi,  
356 Z., Morlot, J.B., Munier, A., Fradet, M., *et al.* (2017). P-body purification reveals the  
357 condensation of repressed mRNA regulons. Mol. Cell 68, 144-157 e145.
- 358 Hyman, A.A., Weber, C.A., and Julicher, F. (2014). Liquid-liquid phase separation in biology.  
359 Annu. Rev. Cell. Dev. Biol. 30, 39-58.

360 Jeske, M., Bordi, M., Glatt, S., Muller, S., Rybin, V., Muller, C.W., and Ephrussi, A. (2015).  
361 The crystal structure of the *Drosophila* germline inducer Oskar identifies two domains with  
362 distinct Vasa helicase- and RNA-binding activities. *Cell Rep* 12, 587-598.

363 Kawasaki, I., Amiri, A., Fan, Y., Meyer, N., Dunkelbarger, S., Motohashi, T., Karashima, T.,  
364 Bossinger, O., and Strome, S. (2004). The PGL family proteins associate with germ granules  
365 and function redundantly in *Caenorhabditis elegans* germline development. *Genetics* 167, 645-  
366 661.

367 Kawasaki, I., Shim, Y.-H., Kirchner, J., Kaminker, J., Wood, W.B., and Strome, S. (1998).  
368 PGL-1, a predicted RNA-binding component of germ granules, is essential for fertility in *C.*  
369 *elegans*. *Cell* 94, 635-645.

370 Keppler, A., Gendreizig, S., Gronemeyer, T., Pick, H., Vogel, H., and Johnsson, K. (2003). A  
371 general method for the covalent labeling of fusion proteins with small molecules *in vivo*. *Nat.*  
372 *Biotechnol.* 21, 86-89.

373 Knutson, A.K., Egelhofer, T., Rechtsteiner, A., and Strome, S. (2017). Germ granules prevent  
374 accumulation of somatic transcripts in the adult *Caenorhabditis elegans* germline. *Genetics* 206,  
375 163-178.

376 Kortemme, T., Kim, D.E., and Baker, D. (2004). Computational alanine scanning of protein-  
377 protein interfaces. *Sci STKE* 2004, pl2.

378 Kuznicki, K.A., Smith, P.A., Leung-Chiu, W.M.A., Estevez, A.O., Scott, H.C., and Bennett,  
379 K.L. (2000). Combinatorial RNA interference indicates GLH-4 can compensate for GLH- 1;  
380 these two P granule components are critical for fertility in *C. elegans*. *Development* 127, 2907-  
381 2916.

382 Lee, C., Sorensen, E.B., Lynch, T.R., and Kimble, J. (2016). *C. elegans* GLP-1/Notch  
383 activates transcription in a probability gradient across the germline stem cell pool. *Elife* 5,  
384 e18370.



- 385 Ling, S.H., Decker, C.J., Walsh, M.A., She, M., Parker, R., and Song, H. (2008). Crystal  
386 structure of human Edc3 and its functional implications. *Mol. Cell. Biol.* *28*, 5965-5976.
- 387 Magis, C., Taly, J.F., Bussotti, G., Chang, J.M., Di Tommaso, P., Erb, I., Espinosa-Carrasco,  
388 J., and Notredame, C. (2014). T-Coffee: Tree-based consistency objective function for  
389 alignment evaluation. *Methods Mol. Biol.* *1079*, 117-129.
- 390 Maji, S.K., Perrin, M.H., Sawaya, M.R., Jessberger, S., Vadodaria, K., Rissman, R.A., Singru,  
391 P.S., Nilsson, K.P., Simon, R., Schubert, D., *et al.* (2009). Functional amyloids as natural  
392 storage of peptide hormones in pituitary secretory granules. *Science* *325*, 328-332.
- 393 Markussen, F.H., Michon, A.M., Breitwieser, W., and Ephrussi, A. (1995). Translational  
394 control of *oskar* generates Short OSK, the isoform that induces pole plasma assembly.  
395 *Development* *121*, 3723-3732.
- 396 Nott, T.J., Petsalaki, E., Farber, P., Jervis, D., Fussner, E., Plochowietz, A., Craggs, T.D.,  
397 Bazett-Jones, D.P., Pawson, T., Forman-Kay, J.D., *et al.* (2015). Phase transition of a  
398 disordered nuage protein generates environmentally responsive membraneless organelles. *Mol.*  
399 *Cell* *57*, 936-947.
- 400 Paix, A., Folkmann, A., Rasoloson, D., and Seydoux, G. (2015). High efficiency, homology-  
401 directed genome editing in *Caenorhabditis elegans* using CRISPR-Cas9 ribonucleoprotein  
402 complexes. *Genetics* *201*, 47-54.
- 403 Saha, S., Weber, C.A., Nusch, M., Adame-Arana, O., Hoege, C., Hein, M.Y., Osborne-  
404 Nishimura, E., Mahamid, J., Janel, M., Jawerth, L., *et al.* (2016). Polar positioning of phase-  
405 separated liquid compartments in cells regulated by an mRNA competition mechanism. *Cell*  
406 *166*, 1572-1584 e1516.
- 407 Schisa, J.A., Pitt, J.N., and Priess, J.R. (2001). Analysis of RNA associated with P granules  
408 in germ cells of *C. elegans* adults. *Development* *128*, 1287-1298.
- 409 Singh, G., Pratt, G., Yeo, G.W., and Moore, M.J. (2015). The clothes make the mRNA: past  
410 and present trends in mRNP fashion. *Annu. Rev. Biochem.* *84*, 325-354.



411 Spike, C., Meyer, N., Racen, E., Orsborn, A., Kirchner, J., Kuznicki, K., Yee, C., Bennett, K.,  
412 and Strome, S. (2008). Genetic analysis of the *Caenorhabditis elegans* GLH family of P-granule  
413 proteins. *Genetics* 178, 1973-1987.

414 Strome, S., and Updike, D. (2015). Specifying and protecting germ cell fate. *Nat. Rev. Mol.*  
415 *Cell Biol.* 16, 406-416.

416 Tang, W., Tu, S., Lee, H.C., Weng, Z., and Mello, C.C. (2016). The RNase PARN-1 trims  
417 piRNA 3' ends to promote transcriptome surveillance in *C. elegans*. *Cell* 164, 974-984.

418 Updike, D., and Strome, S. (2010). P granule assembly and function in *Caenorhabditis*  
419 *elegans* germ cells. *J Androl* 31, 53-60.

420 Updike, D.L., Hachey, S.J., Kreher, J., and Strome, S. (2011). P granules extend the nuclear  
421 pore complex environment in the *C. elegans* germ line. *J. Cell Biol.* 192, 939-948.

422 Updike, D.L., Knutson, A.K., Egelhofer, T.A., Campbell, A.C., and Strome, S. (2014). Germ-  
423 granule components prevent somatic development in the *C. elegans* germline. *Curr. Biol.* 24,  
424 970-975.

425 Vanzo, N.F., and Ephrussi, A. (2002). Oskar anchoring restricts pole plasm formation to the  
426 posterior of the *Drosophila* oocyte. *Development* 129, 3705-3714.

427 Voronina, E., Paix, A., and Seydoux, G. (2012). The P granule component PGL-1 promotes  
428 the localization and silencing activity of the PUF protein FBF-2 in germline stem cells.  
429 *Development* 139, 3732-3740.

430 Voronina, E., Seydoux, G., Sassone-Corsi, P., and Nagamori, I. (2011). RNA granules in  
431 germ cells. *Cold Spring Harb Perspect Biol* 3, a002774.

432 Wang, J.T., Smith, J., Chen, B.C., Schmidt, H., Rasoloson, D., Paix, A., Lambrus, B.G.,  
433 Calidas, D., Betzig, E., and Seydoux, G. (2014). Regulation of RNA granule dynamics by  
434 phosphorylation of serine-rich, intrinsically disordered proteins in *C. elegans*. *Elife* 3, e04591.

435 Wedeles, C.J., Wu, M.Z., and Claycomb, J.M. (2013). Protection of germline gene  
436 expression by the *C. elegans* Argonaute CSR-1. *Dev. Cell* 27, 664-671.

437 Wippich, F., Bodenmiller, B., Trajkovska, M.G., Wanka, S., Aebersold, R., and Pelkmans, L.  
438 (2013). Dual specificity kinase DYRK3 couples stress granule condensation/dissolution to  
439 mTORC1 signaling. *Cell* 152, 791-805.

440 Wu, H., and Fuxreiter, M. (2016). The structure and dynamics of higher-order assemblies:  
441 amyloids, signalosomes, and granules. *Cell* 165, 1055-1066.

442 Zeiser, E., Frøkjær-Jensen, C., Jorgensen, E., and Ahringer, J. (2011). MosSCI and gateway  
443 compatible plasmid toolkit for constitutive and inducible expression of transgenes in the *C.*  
444 *elegans* germline. *PLoS One* 6, e20082.

445

446

447 **Figure Legends**

448 **Figure 1.** Crystal structure of the PGL NTD

449 (A) Left, *C. elegans* adult hermaphrodite possesses two gonadal arms with proliferating germ  
450 cells at one end (asterisk) and differentiating gametes at the other. Gonads make sperm (blue)  
451 first and then oocytes (pink). Right, P-granules (magenta) reside at the nuclear periphery of all  
452 germ cells until late oogenesis. (B) Linear diagram of *C. elegans* PGL-1. (C) Crystal structure of  
453 *C. japonica* PGL-1 NTD to 1.5 Å. NTD has four copies per asymmetric unit (ASU). Copies in  
454 yellow, gold, tan, and brown. Arrows indicate two pairs of subunit interfaces in the ASU. Red  
455 arrows highlight the interface relying on conserved amino acids (see text). (D) Enlarged image  
456 of a single NTD.

457

458 **Figure 2.** NTD dimerization and its role in PGL self-assembly

459 (A) Structural model of the NTD dimer. (B-C) Enlargement of dimer interface (red box in A).  
460 PGL-1 K126 and K129 (B), and R123 (C) interact with apposing subunit side chains. Residue  
461 labels in yellow or gold to indicate their representative subunits. (D-E) Size exclusion  
462 chromatography and multi-angle light scattering (SEC-MALS) of recombinant PGL-3 NTD wild  
463 type (D-E), K126E K129E (D) and R123E (E) proteins. A280 UV absorbance (left y axis) was  
464 normalized to the maximum value. Molecular weight (MW, right y axis) for MALS in daltons  
465 (Da). Wild-type protein (blue) measured the approximate size of a dimer, while both mutant  
466 proteins (red) measured approximately as monomers. (F) Diagram of *C. elegans* PGL-1 C-  
467 terminally tagged with GFP. (G-J). Representative images of GFP-tagged PGL-1 (G), GFP  
468 alone (H), and GFP-tagged PGL-1 K126E K129E (I) and R123E (J) mutants expressed in  
469 Chinese Hamster Ovary (CHO) cells. Cell cultures were imaged live, and GFP-positive cells  
470 counted for the presence or absence of granules. Images show the majority result (percentages  
471 noted above image). Scale bar, 10 µm.

472

473 **Figure 3.** NTD dimerization is critical for fertility and P-granule formation in nematodes  
474 (A) Site of SNAP tag insertion in *C. elegans* PGL-1. (B) Fertility of SNAP tagged PGL-1 animals.  
475 Percentages were obtained after scoring individuals for production of larval progeny after 5 days  
476 at either 20°C or 25°C. (C-P) Extruded adult germlines, fixed, stained and imaged in same  
477 region of meiotic pachytene (see **Figure S3A**). (C-F) Representative images of SNAP staining  
478 to visualize PGL-1 expression and granule formation. All images are partial z-stacks to  
479 maximize visualization of P-granules. Images were taken from germlines producing embryos;  
480 similar images were obtained from germlines too defective to make embryos (**Figure S3F-G**).  
481 (C) Control, wild type animal lacking SNAP tag shows virtually no background staining (n=20).  
482 (D) PGL-1::SNAP localizes to granules around nuclei (n=49). (E) PGL-1::SNAP K126E K129E  
483 is diffuse (n=38). (F) PGL-1::SNAP R123E is diffuse (n=24). (G-P) Representative images  
484 showing localization of three P-granule components in germ cells expressing either PGL-  
485 1::SNAP (G-K, n=20) or PGL-1::SNAP K126E K129E (L-P, n=14). (G,L) DNA (DAPI); (H,M)  
486 SNAP (PGL-1::SNAP or mutant); (I,N) V5 (PGL-3); (J,O) MYC (GLH-1); (K,P) Merge. Scale bar,  
487 10 µm for all images, except two-fold enlargements of nuclei in white boxes that are placed  
488 outside main images.

489  
490 **Figure 4.** PGL assembly is required for repression of tethered mRNA reporter *in vivo*  
491 (A) Tethering assay. The reporter mRNA encodes GFP-histone H2B and harbors three boxB  
492 hairpins in its 3'UTR; a ubiquitous germline promoter drives expression (see Methods).  $\lambda$ N22  
493 peptide (light blue) is inserted into PGL-1::SNAP. Binding of PGL-1::SNAP:: $\lambda$ N22 to boxB  
494 hairpins recruits PGL-1 to reporter mRNA. (B-D) GFP reporter expression in germ cells of live  
495 animals. Above, brightfield image; below GFP fluorescence (green); auto fluorescence (red). n,  
496 number of animals scored for GFP expression. Scale bar, 10 µm, in (B) applies to all images.  
497 (E-G) Representative images of PGL granule formation, seen by SNAP staining (magenta), and  
498 GFP fluorescence (green) in fixed gonads. n, number of germlines scored for GFP expression.

499 Scale bar, 10  $\mu\text{m}$ , in (E) applies to all images. (H) Model of P-granule assembly and function.  
500 Left, NTD dimerization allows PGL granule formation, which traps and represses mRNA  
501 transcripts. Right, loss of PGL granule formation derepresses granule-localized mRNA  
502 transcripts. See text for further Discussion.  
503  
504

505 **Supplemental Figure Captions**

506

507 **Table S1.** *C. japonica* PGL-1 NTD crystal structure data and model statistics

508

509 **Figure S1.** PGL sequence alignment and locus

510 (A) Sequence alignment of PGL NTD domain in *C. elegans* (*Ce*), *C. japonica* (*Cj*), *C. brenneri*

511 (*Cbn*), *C. briggsae* (*Cbr*), *C. remanei* (*Cr*). Alignment and conservation (cons.) determined by T-

512 Coffee (Magis et al., 2014). Starred residues (\*) are identical. Period (.) and colon (:) residues

513 are similar. Residues participating in salt bridges only are in orange. Residues participating in

514 hydrogen bonds only are in yellow. Residues forming both hydrogen bonds and salt bridges are

515 highlighted in red. *C. elegans* PGL-1 missense mutations and their allele numbers are labeled.

516 Dashed lines mark the end of PGL-1 NTD domain and start of PGL-1 DD domain. (B) *pgl-1*

517 (ZK481.4a.1) primary transcript. 5' and 3' UTRs are grey, exons are white, numbered 1-8 and

518 separated by introns. Sites of *pgl-1* mutations are labeled, including location of SNAP tag

519 (magenta) and  $\lambda$ N22 fusion (blue).

520

521 **Figure S2.** Supplemental biochemical and structural analyses of PGL NTD

522 (A,B) Coomassie-stained polyacrylamide gel of recombinant PGL NTD wild type and mutant

523 protein. Ladder marker sizes labeled in kilodaltons (kDa) on right. (A) Recombinant *C. japonica*

524 (*Cj*) PGL-1 NTD protein used for crystallization. Recombinant *C. elegans* PGL-3 NTD protein

525 included for comparison. (B) Wild type and mutant *C. elegans* PGL-3 NTD recombinant proteins

526 used for biochemical characterization. (C) Tables of predicted hydrogen bonds and salt bridges

527 at the NTD dimerization interface. Amino acid numbers correspond to *C. japonica* PGL-1 NTD.

528 (D-E) Surface representation of the NTD dimerization interface. (D) Amino acids colored by

529 identity (red) and similarity (pink). (E) Amino acids at dimerization interface (purple).

530

531 **Figure S3.** Supplemental images of PGL-1 dimerization mutants

532 (A) Schematic of an adult hermaphrodite germline. An asterisk marks proliferating germ cells  
533 here and in images B-D. The germline produces oocytes at this stage; sperm were made earlier  
534 and stored in the spermatheca (not shown). Red box marks region imaged in F-I. (B-D)  
535 Representative brightfield images of extruded gonads from worms grown at 20°C. Scale bar, 10  
536 µm. (B) PGL-1::SNAP gonads are of normal size and produce oocytes and embryos. (C)  
537 Representative images of PGL-1::SNAP K126E K129E sterile gonads, which are small and  
538 produce no gametes. (D) PGL-1::SNAP R123E sterile gonads are also small and produce no  
539 gametes. (F-I) Representative partial z-projection stacks of SNAP and DNA stained germlines.  
540 Scale bar, 10 µm, applies for all images. (F,G) PGL-1 is expressed in sterile gonads (no  
541 embryos observed). (F) n=21 gonads imaged; (G) n=30 gonads imaged. (H-I) In single rare  
542 gonads, PGL-1 mutants were seen to assemble into granules in all germ cells. Note the diffuse  
543 staining between nuclei, which is not seen in the wild-type PGL-1::SNAP (see **Figure 3D**).

544

545 **Figure S4.** GFP reporter is not subject to germline silencing

546 Gonads were extruded from animals harboring (A-D) PGL-1::SNAP (n=30); (E-H,M) PGL-  
547 1::SNAP::λN22 (n=27); (I-L) PGL-1::SNAP::λN22 K126E K129E (n=10). Gonads were fixed and  
548 imaged for *gfp* RNA using smFISH (A,E,I), GFP protein fluorescence (B,F,J), DNA (DAPI) and  
549 SNAP (C,G,K). The three are merged in D, H, L, and M. White arrows mark examples of  
550 intranuclear puncta; black arrows mark examples of cytoplasmic puncta. (I) Six additional  
551 examples of germlines harboring PGL-1::SNAP::λN22, imaged for *gfp* RNA, DNA, and SNAP.  
552 Scale bar, 5 µm, for all images, except image in inset (white box) enlarged 2.5-fold. For  
553 germline location, see **Figure S3A**.

554

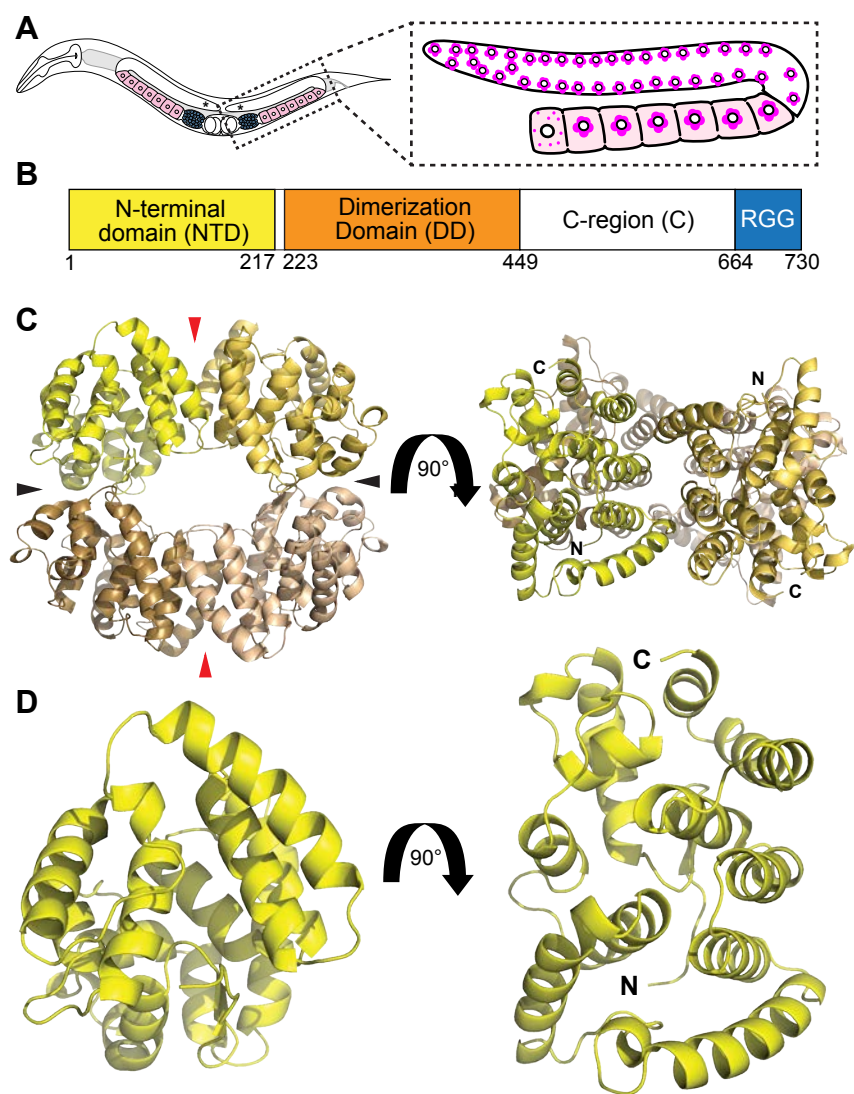



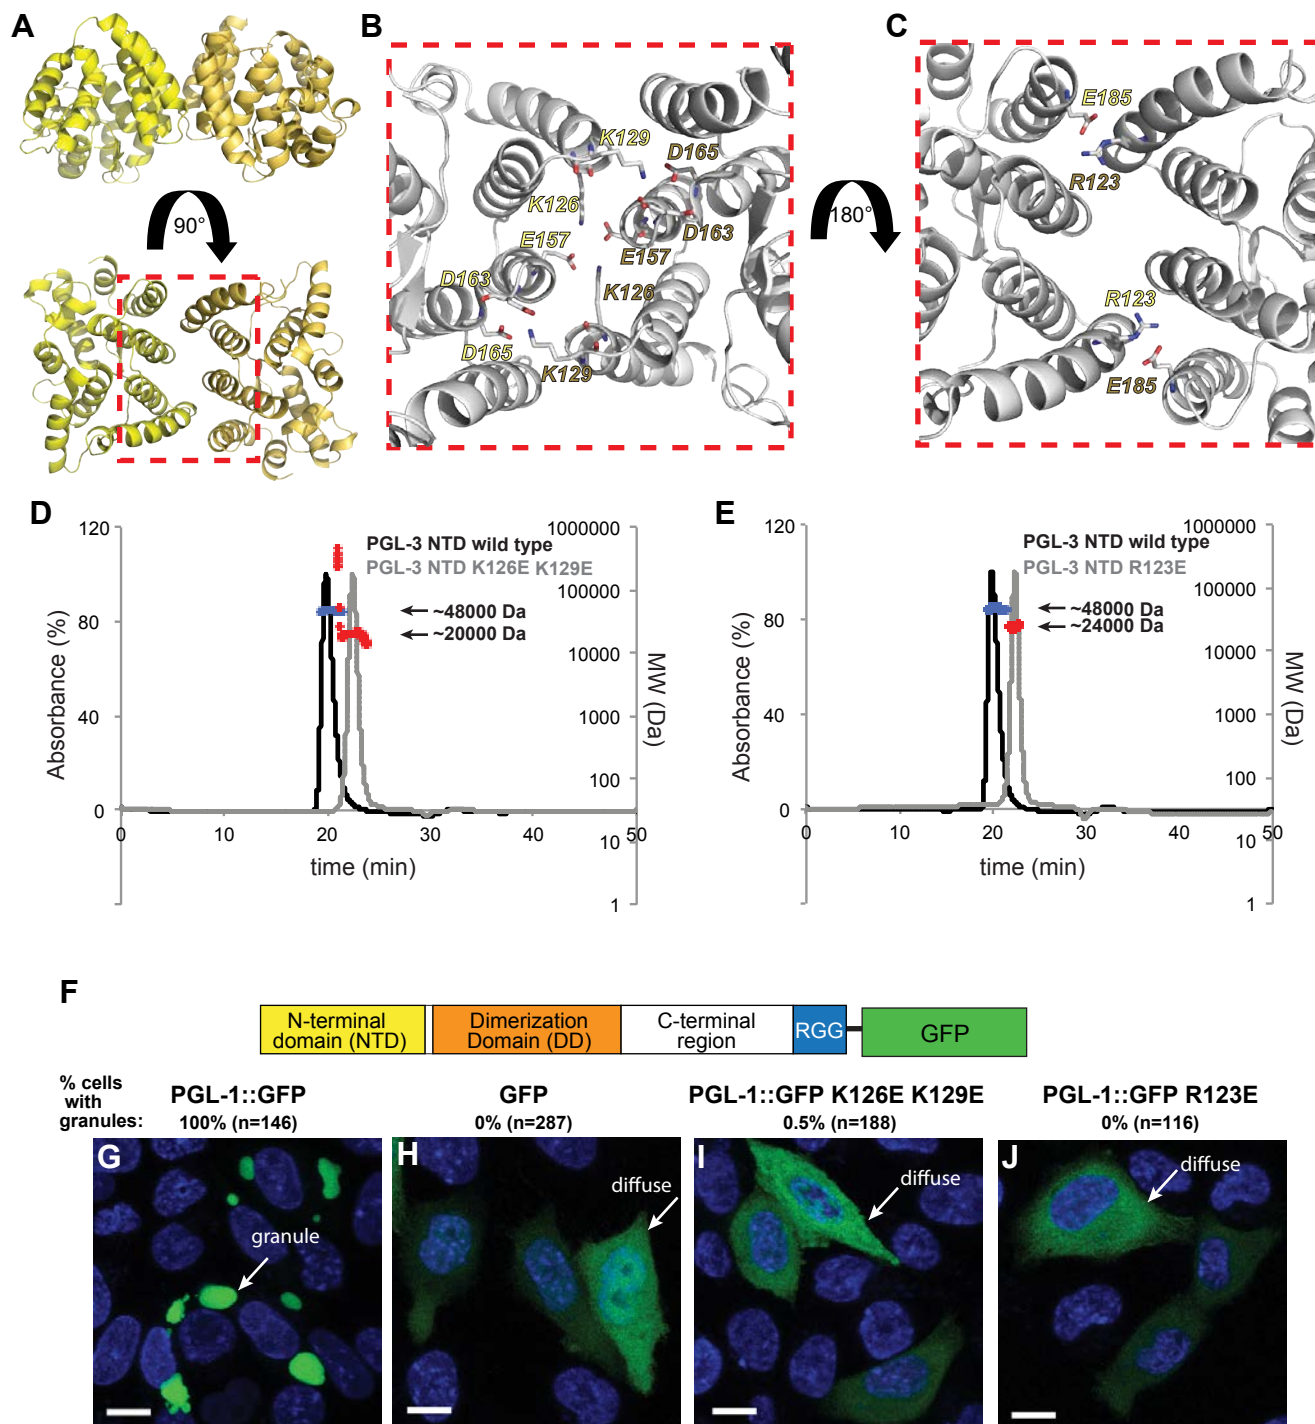

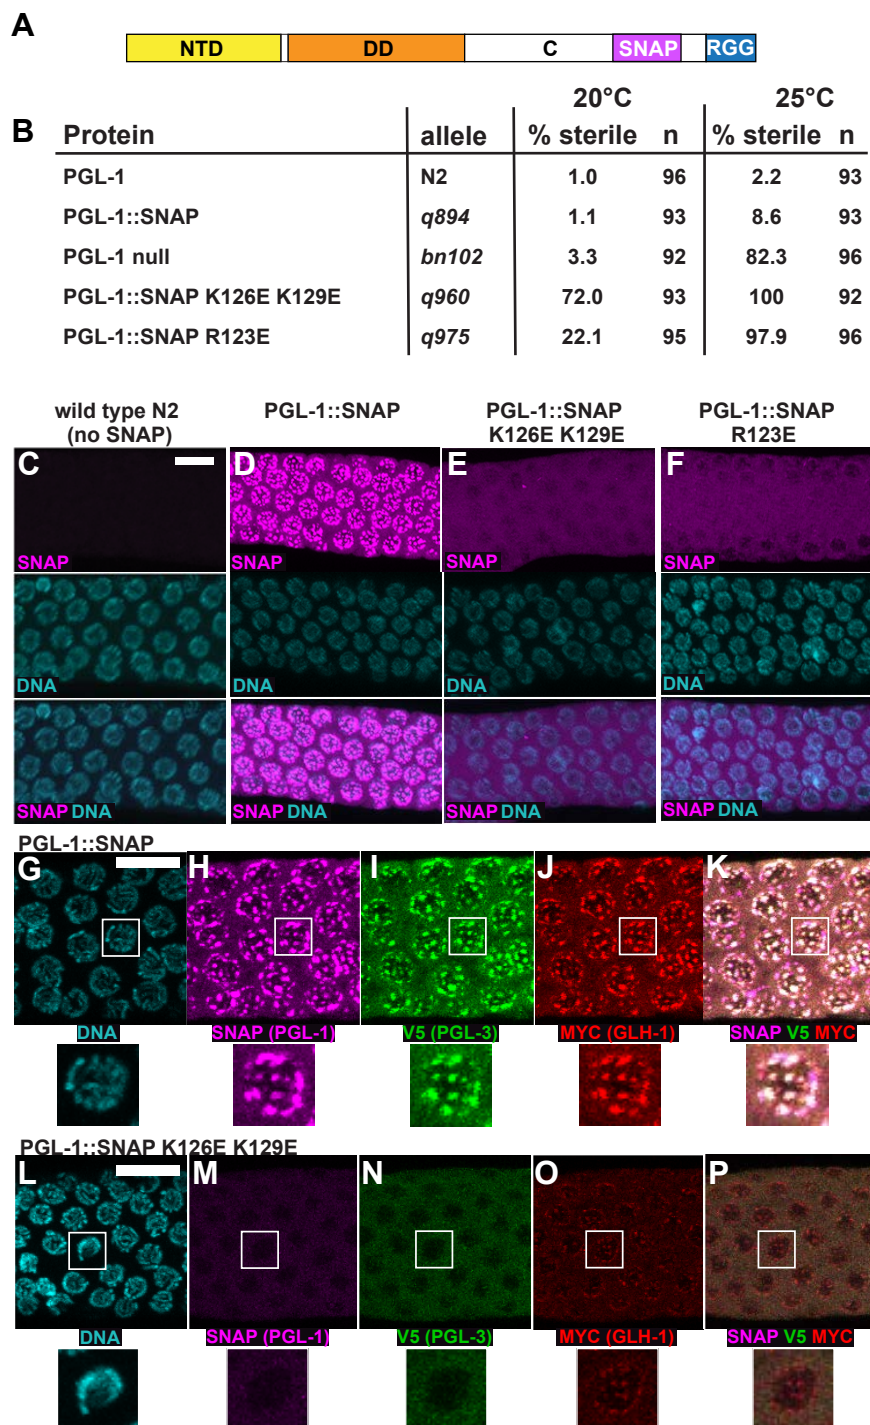

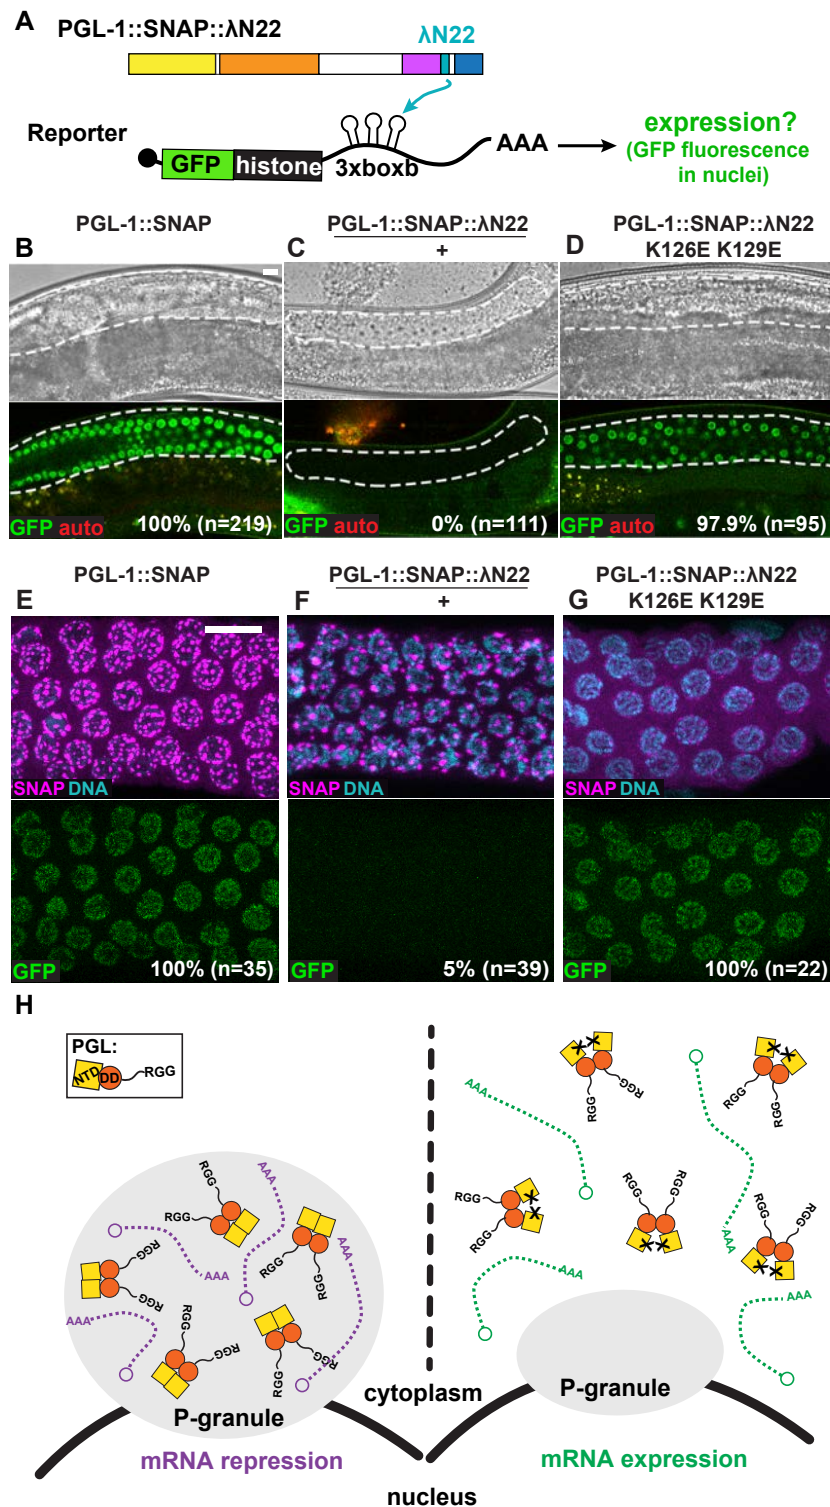

**Table S1. Data collection and refinement statistics.**

|                                       | <b>JaPGL-1N SeMet (5W4D)</b>  | <b>JaPGL-1N wt (5W4A)</b>       |
|---------------------------------------|-------------------------------|---------------------------------|
| <b>Wavelength</b>                     | 0.9786                        | 0.984                           |
| <b>Resolution range</b>               | 48.47 - 1.599 (1.656 - 1.599) | 30.36 - 1.5 (1.554 - 1.5)       |
| <b>Space group</b>                    | C 1 2 1                       | C 1 2 1                         |
| <b>Unit cell</b>                      | 133.3 94.8 72.5 90 91.4 90    | 132.77 94.67 72.95 90 90.756 90 |
| <b>Total reflections</b>              | 880332 (81451)                | 2176741 (194944)                |
| <b>Unique reflections</b>             | 115340 (11239)                | 143729 (14301)                  |
| <b>Multiplicity</b>                   | 7.6 (7.2)                     | 15.1 (13.6)                     |
| <b>Completeness (%)</b>               | 97.06 (95.16)                 | 99.77 (99.33)                   |
| <b>Mean I/sigma(I)</b>                | 24.44 (2.30)                  | 16.91 (1.85)                    |
| <b>Wilson B-factor</b>                | 22.04                         | 22.44                           |
| <b>R-merge</b>                        | 0.0469 (0.8775)               | 0.08108 (1.282)                 |
| <b>R-meas</b>                         | 0.05038 (0.945)               | 0.08353 (1.332)                 |
| <b>R-pim</b>                          | 0.01827 (0.348)               | 0.01984 (0.357)                 |
| <b>CC1/2</b>                          | 0.999 (0.74)                  | 0.997 (0.662)                   |
| <b>CC*</b>                            | 1 (0.922)                     | 0.999 (0.893)                   |
| <b>Reflections used in refinement</b> | 115302 (11238)                | 143649 (14297)                  |
| <b>Reflections used for R-free</b>    | 1424 (129)                    | 1468 (151)                      |
| <b>R-work</b>                         | 0.1607 (0.2590)               | 0.1681 (0.3038)                 |
| <b>R-free</b>                         | 0.1925 (0.2707)               | 0.2039 (0.3232)                 |
| <b>CC(work)</b>                       | 0.962 (0.864)                 | 0.967 (0.802)                   |
| <b>CC(free)</b>                       | 0.939 (0.819)                 | 0.974 (0.794)                   |
| <b>Number of non-hydrogen atoms</b>   | 7593                          | 7785                            |
| <b>macromolecules</b>                 | 6768                          | 6813                            |
| <b>ligands</b>                        | 168                           | 136                             |

|                                  |       |       |
|----------------------------------|-------|-------|
| <b>solvent</b>                   | 657   | 836   |
| <b>Protein residues</b>          | 846   | 853   |
| <b>RMS(bonds)</b>                | 0.010 | 0.010 |
| <b>RMS(angles)</b>               | 1.00  | 0.99  |
| <b>Ramachandran favored (%)</b>  | 98.68 | 98.10 |
| <b>Ramachandran allowed (%)</b>  | 1.32  | 1.90  |
| <b>Ramachandran outliers (%)</b> | 0.00  | 0.00  |
| <b>Rotamer outliers (%)</b>      | 1.33  | 0.66  |
| <b>Clashscore</b>                | 2.29  | 1.86  |
| <b>Average B-factor</b>          | 30.58 | 30.21 |
| <b>macromolecules</b>            | 29.29 | 28.97 |
| <b>ligands</b>                   | 53.64 | 51.75 |
| <b>solvent</b>                   | 37.95 | 36.82 |
| <b>Number of TLS groups</b>      | 1     | 1     |

Statistics for the highest-resolution shell are shown in parentheses.





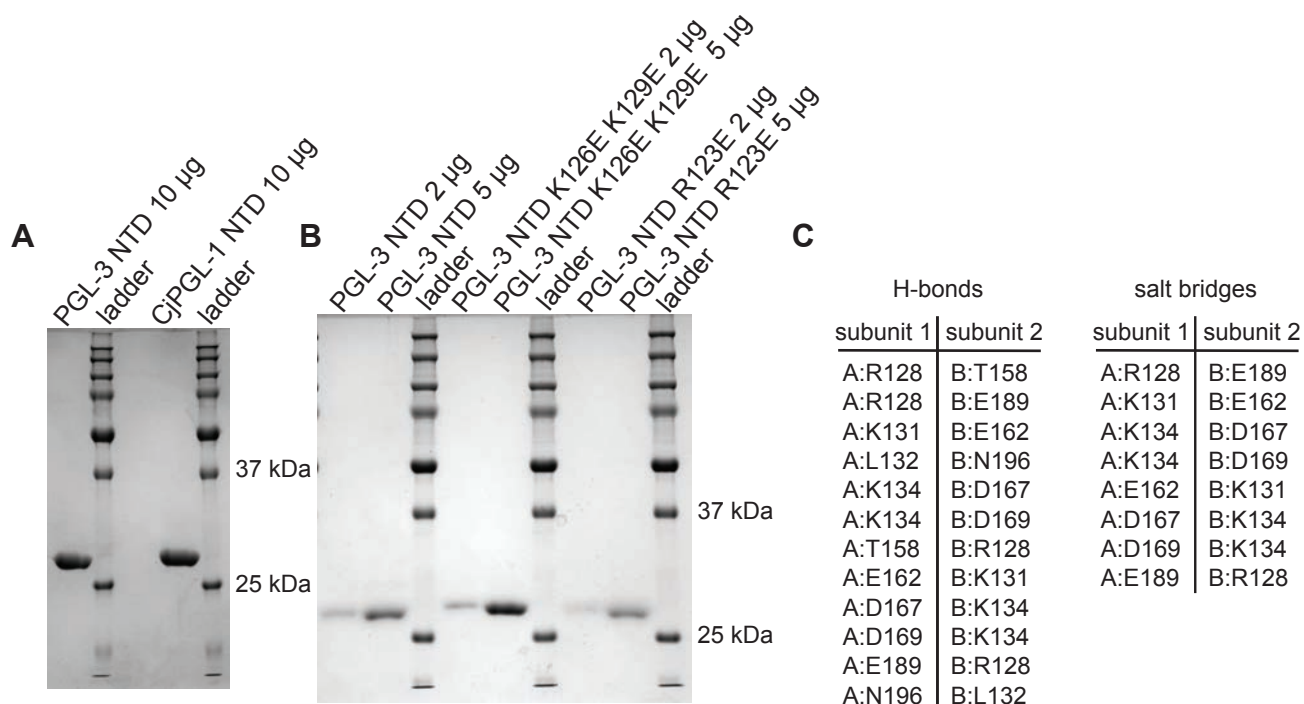

**D**

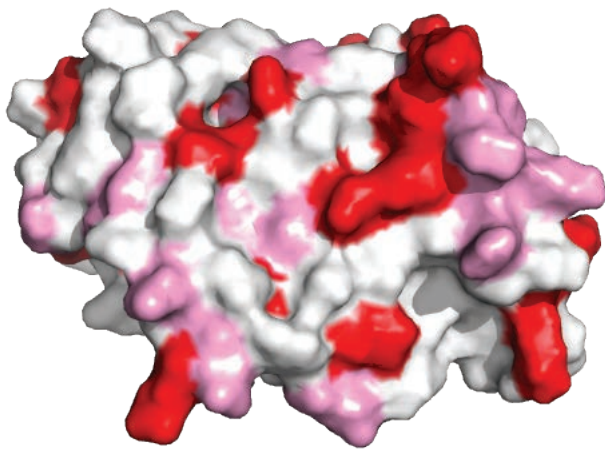

**E**

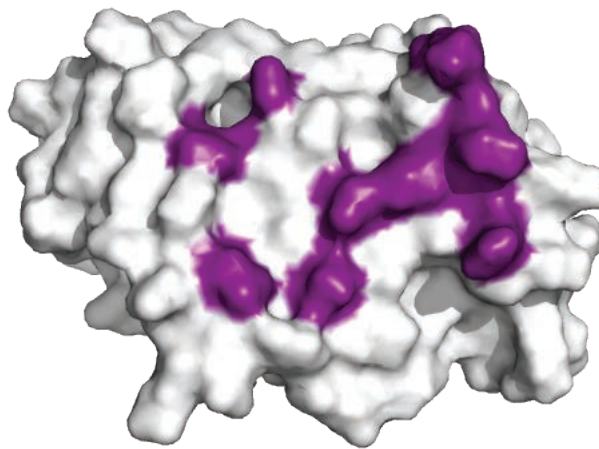

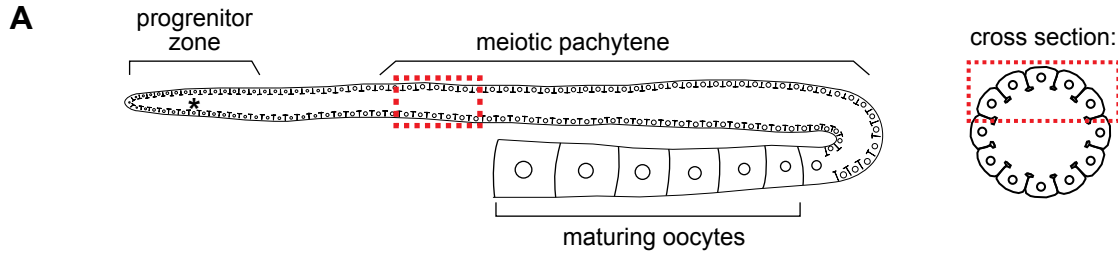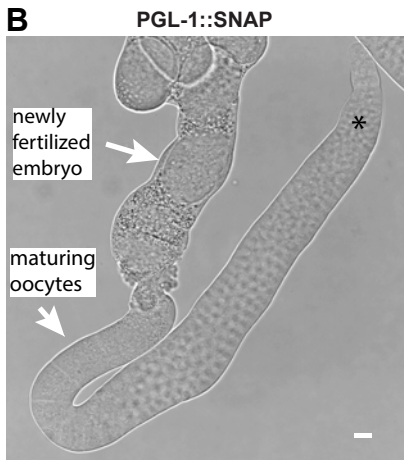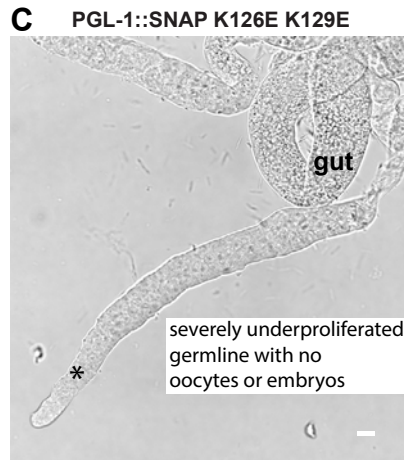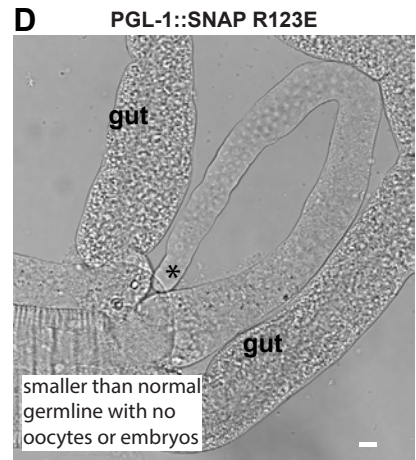

PGL-1::SNAP staining in most sterile gonads      PGL-1::SNAP granules in rare gonads

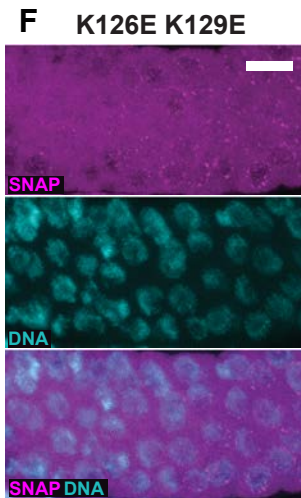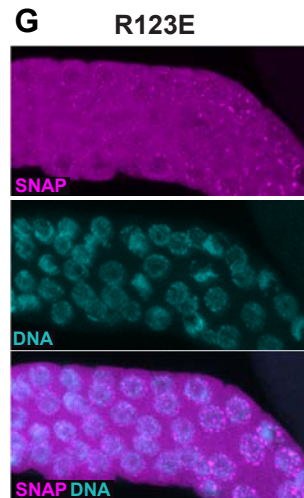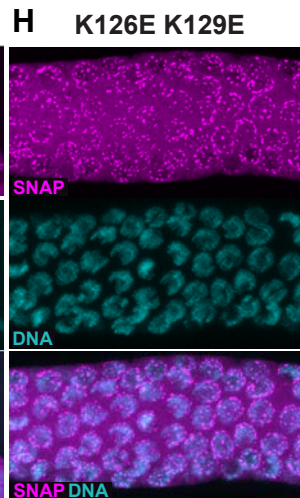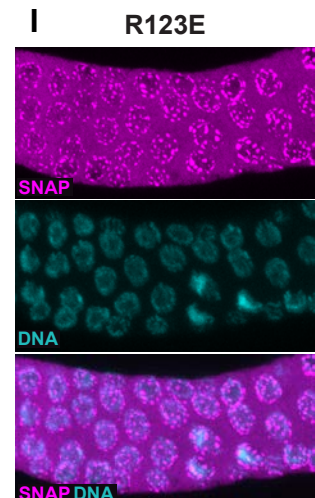



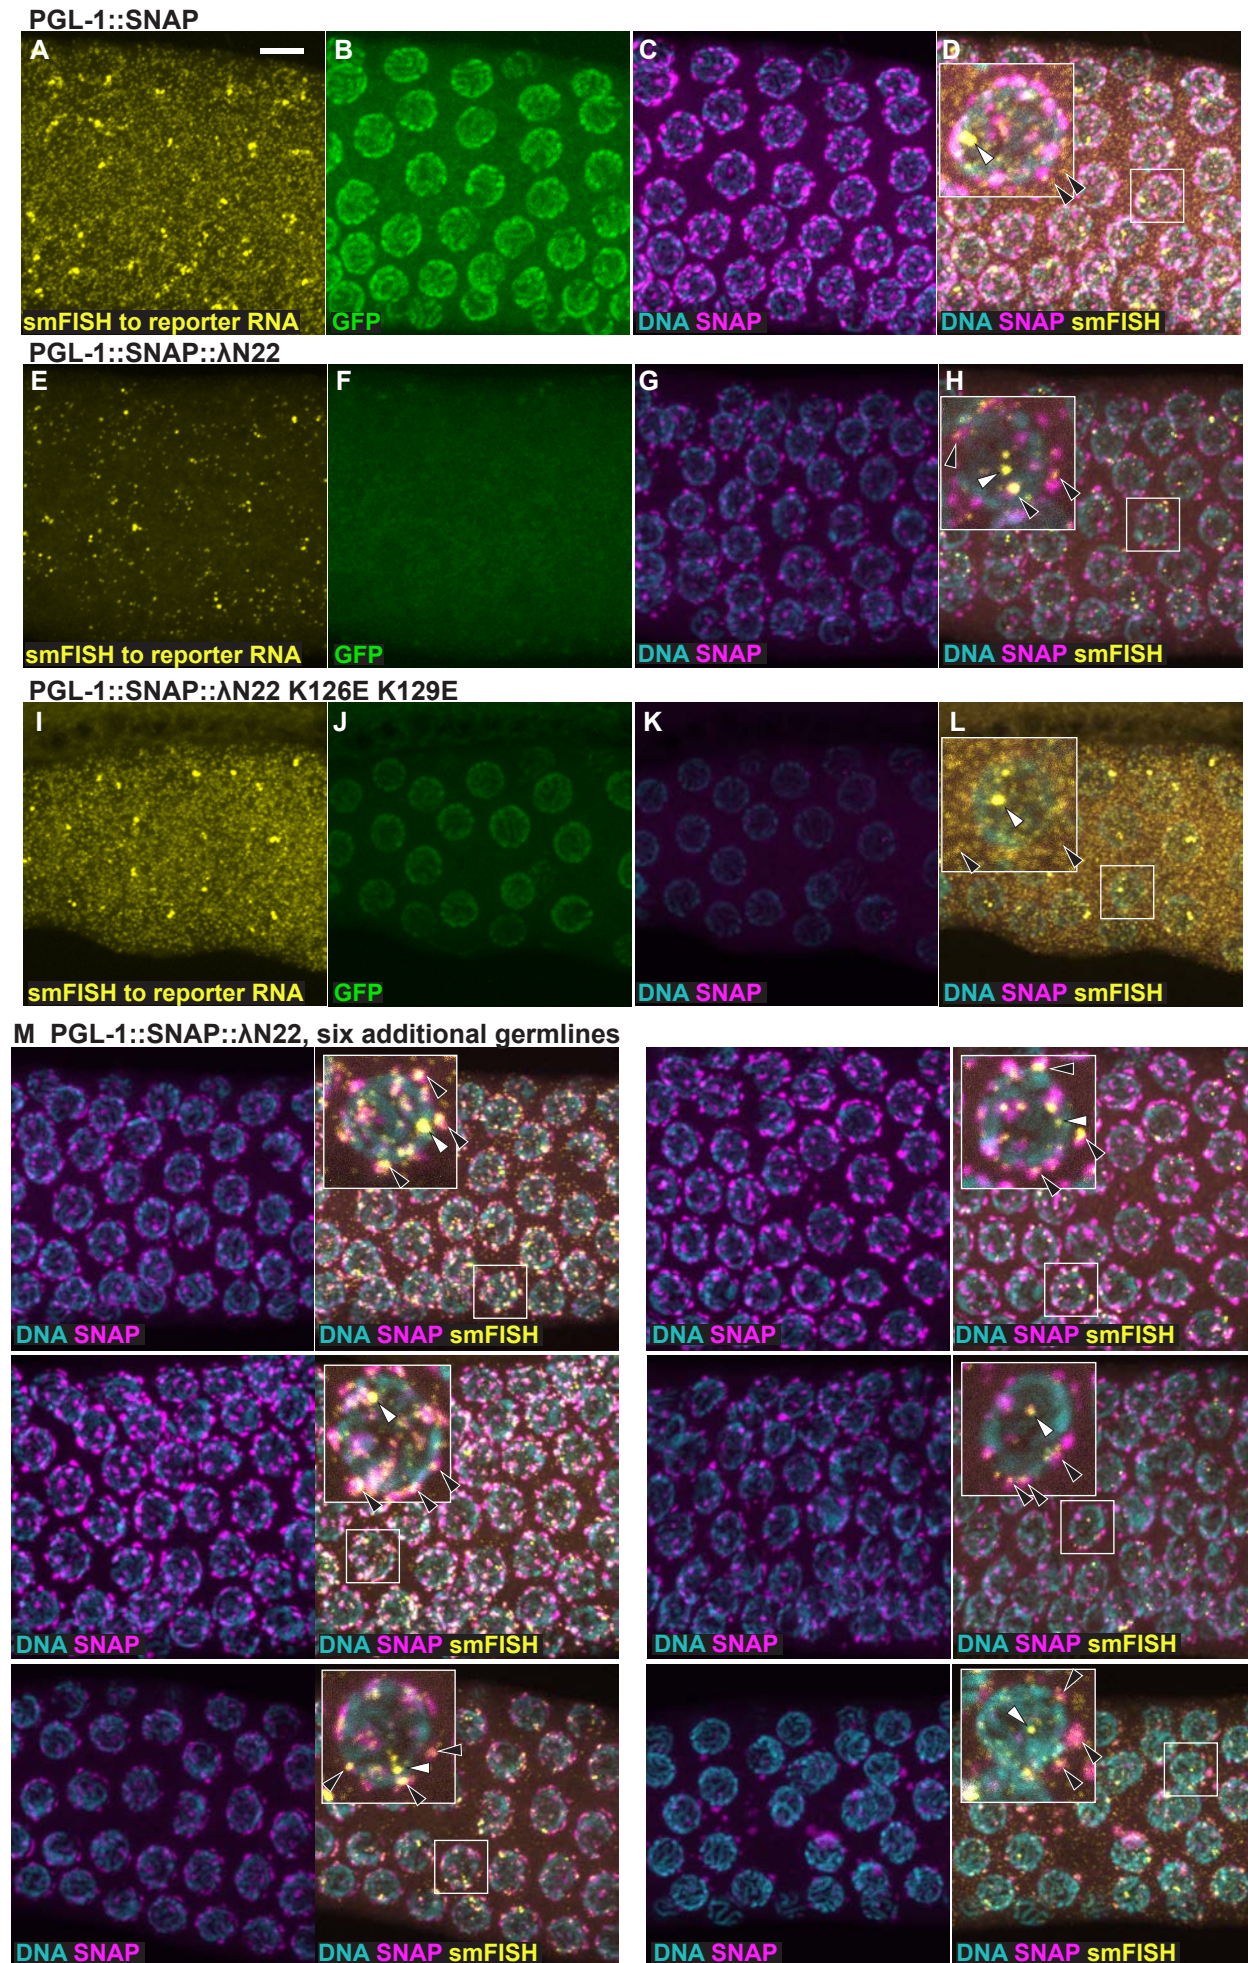

## 1 **Materials and Methods**

### 2 **Protein expression and purification**

3 We previously used *C. elegans* PGL-3 recombinant protein and limited proteolysis to identify a central  
4 dimerization domain (DD) (Aoki et al., 2016). While we could express DD efficiently we could not express  
5 recombinant protein that was N-terminal to the cleavage site (PGL-3 amino acid residues 205-206). We  
6 tried moving the six histidine purification tag to the N- and C- termini, shortened the protein regions used  
7 for expression, and tried several different orthologs with little success. The insight came after aligning  
8 protein sequences of several *Caenorhabditid sp.* and studying the DD domain boundary (**Figure S1A**).  
9 Protease cleavage occurred in a conserved portion of the N-terminal region and this region was  
10 disordered in our DD crystal structures. After inclusion of this region (PGL-3 amino acid residues 205-  
11 212), we could express and purify recombinant N-terminal protein from *C. elegans* PGL-1 and its  
12 orthologs. We henceforth refer to this region as the N-terminal domain (NTD).

13  
14 This study used primarily *C. elegans* PGL-3 and *C. japonica* PGL-1 recombinant NTD proteins. The *C.*  
15 *elegans* PGL-3 coding region was PCR amplified from cDNA. A codon-optimized (*E. coli*) version of *C.*  
16 *japonica* PGL-1 NTD was ordered as a gBlock (IDT). We included a six-histidine tag at the C-terminus  
17 that was removed later with carboxypeptidase A (Arnau et al., 2006). Constructs were cloned into a  
18 pET21a vector (Merck-Millipore) with Gibson Assembly cloning (Gibson, 2011), and plasmids transformed  
19 into Rosetta2 cells (EMD-Millipore). Cultures were grown at 37°C with shaking (225 rpm) until ~0.8 OD,  
20 cooled for 30-60 minutes, and induced with a final concentration of 0.1 mM IPTG. Cultures were then  
21 grown at 16°C with shaking (160 rpm) for 16-18 hours, collected, and bacterial pellets frozen until use.  
22 Selenomethionine-incorporated *C. japonica* protein was expressed in SelenoMethionine Medium  
23 Complete (Molecular Dimensions), and grown, induced, and collected in a similar manner.

24  
25 Bacterial pellets were defrosted on ice and reconstituted in lysis buffer (20 mM Sodium Phosphate pH  
26 7.4, 300 mM NaCl, 10 mM imidazole, 5 mM beta-mercaptoethanol (BME)) with protease inhibitors  
27 (cOmplete™ EDTA-free, Roche). Lysozyme was added at 50 µg/ml and incubated on ice for 20 minutes  
28 prior to lysis in a french press. Samples were spun at low (3220 x g, 4°C, 20 minutes) and high speed



29 (10,000 x g, 20°C, 10 minutes), then incubated with 1.5 ml NiNTA beads (Thermo Scientific) for 1 hour at  
30 4°C with rotation. Sample supernatant was separated by gravity flow, washed twice with lysis buffer, and  
31 eluted using lysis buffer with increasing imidazole concentrations (20, 40, 60, 80, 100, 250 mM). Eluted  
32 samples were checked for protein via Bradford assay (Bio-Rad), and dialyzed overnight in HN buffer (20  
33 mM HEPES pH 7.4, 100 mM NaCl). The dialyzed samples were concentrated with a Centriprep 10K  
34 concentrator (Millipore), calcium added to 1 mM CaCl<sub>2</sub>, and the histidine tag removed with  
35 carboxypeptidase A bound to agarose (Sigma) at a ratio of 10 protein:1 enzyme (w/w). Samples were  
36 incubated at room temperature (~20°C) for 45-90 minutes with rotation prior to supernatant elution by  
37 centrifugation in microflow columns (Pierce). Samples were run on a S200 sizing column (GE Healthcare)  
38 in HNT buffer (20 mM HEPES pH 7.4, 100 mM NaCl, 0.5 mM TCEP pH 7.4). Fractions containing  
39 recombinant protein were collected, concentrated in an Amicon 10K concentrator (Millipore), and protein  
40 concentration estimated by A280. Samples were frozen in liquid nitrogen or used immediately.

41

#### 42 **Crystallization and structure determination**

43 *C. elegans* PGL-1, *C. elegans* PGL-3, and *C. japonica* PGL-1 NTD recombinant protein were screened in  
44 crystallization conditions using 400 nl hanging and sitting drop 96-well trays set up with the Mosquito  
45 (TTP Labtech) in 20°C. Several conditions produced labile crystal plates. Data was collected to 4 Å from  
46 *C. elegans* PGL-1 crystal plates, determined to have a very large unit cell (86 Å x 86 Å x 460 Å) and P6  
47 point group, and eventually determined to have perfect merohedral twinning. *C. japonica* PGL-1 also  
48 crystallized as large (60-150 Å) rhomboid crystals in 40-45% PEG 400 at low (Na Citrate pH 5.5-6.0) and  
49 physiologic pH (imidazole pH 7.5-8.0). Crystals grown in citrate or imidazole both diffracted well, but we  
50 used imidazole (100 mM imidazole pH 7.5, 45% PEG 400, 1 mM TCEP pH 7.4) due to its higher  
51 reproducibility for large crystals and its modestly better resolution. The crystals did not require additional  
52 cryo-protection due to the high PEG 400. We eventually collected a full data set to 1.5 Å in space group  
53 C2.

54

55 PGL-1 NTD was a novel domain. Novelty and translational pseudosymmetry precluded us from using any  
56 model for molecular replacement. Trial heavy atom soaks also proved unfruitful, and the *C. japonica* PGL-

57 1 NTD has just two methionines past the start codon, making selenomethionine phasing challenging. To  
58 boost anomalous signal, we mutated two non-conserved isoleucines to methionines (I63M, I212M). This  
59 methionine mutant provided phases to 3.6 Å by single anomalous dispersion (SAD) that we used to build  
60 a 1.6 Å model of the mutant protein (PDB ID: **5W4D**). We used this model for molecular replacement into  
61 the wild-type data set to build a complete 1.5 Å model (PDB ID: **5W4A**). Data and model statistics are in  
62 Supplemental Table 1. Model coordinates and data are available at RCSB ([www.rcsb.org](http://www.rcsb.org)).

63

#### 64 **Size exclusion chromatography with multi-angle laser light scattering (SEC-MALS)**

65 Molecular weights of *C. elegans* PGL-3 NTD wild type and mutant recombinant protein were determined  
66 by conducting SEC-MALS experiments using Agilent Technologies 1260 LC HPLS system (Agilent  
67 Technologies) equipped with Dawn® Heleos™ II 18-angle MALS light scattering detector, Optilab® T-  
68 rEX™ (refractometer with EXtended range) refractive index detector, WyattQELS™ quasi-elastic  
69 (dynamic) light scattering (QELS) detector and ASTRA software (all four from Wyatt Technology Europe  
70 GmbH). A total of 500 µL (1 mg/mL) of the samples in HNT buffer (20 mM HEPES pH 7.5, 100 mM NaCl,  
71 0.5 mM TCEP pH 7.4) were injected and run on a Superdex 75 10/300 GL column (GE Healthcare) pre-  
72 equilibrated with the same buffer, at a flow rate of 0.5 mL/min at 20°C. Lysozyme (Sigma-Aldrich Corp.)  
73 was used as a control.

74

#### 75 **Mammalian cell culture maintenance, transfection and imaging**

76 Full length PGL-1 was cloned into a pcDNA 3.1 vector (ThermoFisher) with a C-terminal eGFP and  
77 OLLAS epitope linker. Mutations to PGL-1 were created using Gibson Assembly cloning (Gibson, 2011).  
78 Chinese Hamster Ovary (CHO) cells (ATCC) were propagated according to distributor's  
79 recommendations. Briefly, cells were grown in F-12K Medium (Gibco) with 10% fetal bovine serum  
80 (Gibco), and split with Trypsin 0.25% (Gibco) every 2-3 days. Cells were grown to 70% confluence and  
81 transfected with TransIT-CHO Transfection Kit (Mirus Bio). Transfected cells were split the following day  
82 and grown in Ibitreat 15 u-Slide 8 well slides (Ibidi) overnight. Hoechst stain (Invitrogen) was added to  
83 wells prior to imaging by confocal microscopy for GFP and Hoechst fluorescence, and transmitted light.  
84 Well dilutions were chosen based on adequate cell spacing to discern each cell, and 25 fields of view

85 were taken based on the highest concentration of GFP-positive cells. Experiments were repeated four  
86 times with similar results. During image collection, we observed a single example of a granule-like blob in  
87 the PGL-1::OLLAS::GFP K126E K129E. The cell appeared unhealthy, and thus the granule may be an  
88 artifact of cell death, but we included it in our study for completeness.

89

## 90 **Worm maintenance, CRISPR mutagenesis, fertility and imaging**

91 Frozen strains:

92 N2 Bristol

93 JK5687: *pgl-1(q894)[PGL-1::SNAP] IV*

94 JK5902: *pgl-1(q975)[PGL-1::SNAP R123E] IV*

95 JK5898: *glh-1(q858)[GLH-1::3xMYC] I; pgl-1(q894)[PGL-1::SNAP] IV; pgl-3(q861)[PGL-3::3xV5] V*

96 JK5970: *qSi375[(mex-5 promoter::eGFP::linker::his-58::3xboxb::tbb-2 3'UTR) \*weSi2] II; pgl-*  
97 *1(q894)[PGL-1::SNAP] IV*

98 JK5873: *qSi375[(mex-5 promoter::eGFP::linker::his-58::3xboxb::tbb-2 3'UTR) \*weSi2] II; pgl-*  
99 *1(q994)[PGL-1:SNAP:λN22]/nT1[qIs51](IV;V)*

100 JK5874: *qSi375[(mex-5 promoter::eGFP::linker::his-58::3xboxb::tbb-2 3'UTR) \*weSi2] II; pgl-*  
101 *1(q994)[PGL-1:SNAP:λN22]/nT1[qIs51](IV;V)*

102

103 Worm strains that could not be frozen:

104 1. *pgl-1(q960)[PGL-1::SNAP K126E K129E] IV*

105 2. *glh-1(q858)[GLH-1::3xMYC] I; pgl-1(q960)[PGL-1::SNAP K126E K129E] IV; pgl-3(q861)[PGL-3::3xV5]*

106 *V*

107 3. *qSi375[(mex-5 promoter::eGFP::linker::his-58::3xboxb::tbb-2 3'UTR) \*weSi2] II; pgl-1(q1053)[PGL-*  
108 *1:SNAP:λN22 K126E K129E]/nT1[qIs51](IV;V)*

109

110 *C. elegans* were maintained as previously reported (Brenner, 1974). For CRISPR-Cas9 mutagenesis, a  
111 Cas9 protein co-conversion approach was used (Arribere et al., 2014). Briefly, worms were injected with a  
112 target CRISPR-Cas9 RNA (crRNA) or a plasmid expressing a Cas9-scaffold with tandem target sequence

113 RNA (sgRNA) to a gene of interest (Arribere et al., 2014), a target crRNA to *dpy-10* or *unc-58*, a  
114 scaffolding tracrRNA (IDT), recombinant Cas9 protein (Paix et al., 2015), a *dpy-10/unc-58* repair DNA  
115 oligo that inserted a dominant mutation (Arribere et al., 2014), and an epitope tag/missense mutant repair  
116 oligo or PCR product. See below for a Table of guide RNAs and repair templates used. F1s with the co-  
117 injection marker phenotype were additionally screened by a combination of PCR without or with restriction  
118 enzyme digest to identify those with the repair of interest. In JK5687, a SNAP tag (Keppler et al., 2003)  
119 was inserted between PGL-1 amino acids G713 and G714 in N2 worms. A 3xMYC tag was added to the  
120 N-terminus of GLH-1 between G17 and F18. A 3xV5 tag was added in the C-terminal region of PGL-3  
121 between residues G627 and S628. F2s were PCR screened to identify homozygous SNAP alleles and  
122 the PCR product sequenced to confirm proper repair. Three worm strains were too infertile to freeze. All  
123 worms were outcrossed at least twice with N2, with the exception of (*glh-1(q858)[GLH-1::3xMYC] I*; *pgl-*  
124 *1(q960)[PGL-1::SNAP K126E K129E] IV*; *pgl-3(q861)[PGL-3::3xV5] V*) that was backcrossed with  
125 JK5898.

126

127 Worms were singled into the peripheral wells of a 24-well plate that contained NGM agar and OP50  
128 bacteria. Worms were allowed to propagate for 5 days at 20°C or 25°C, and then scored for progeny and  
129 gravid progeny. We report the progeny numbers here.

130

131 To analyze GFP reporter expression, L4 larvae were propagated for approximately 24 hours at 20°C,  
132 placed in M9 with 0.1 mM levamisole on a glass slide with a cover slip, imaged at 10x magnification on a  
133 compound microscope and counted for the presence or absence of GFP fluorescence in its germline.

134 Numbers represent totals from two separate experiments. The reporter images of live worms were taken  
135 of worms treated in a similar manner and visualized on a Leica SP8 scanning laser confocal microscope.

136

137 For confocal imaging, germlines were extruded, fixed with 1-2% paraformaldehyde (Electron Microscopy  
138 Sciences) and permeabilized with 0.5% Triton-X as previously described (Crittenden et al., 2017).

139 Germlines were incubated with primary antibodies to FLAG (M2® (mouse), Sigma) and GFP (Rabbit anti-  
140 GFP, Invitrogen) overnight, stained with fluorophore-labeled secondary antibodies (Alexa 555 Donkey

141 anti-Mouse, Alexa 488 Goat anti-Rabbit; Invitrogen) and DAPI (Invitrogen), washed and mounted in  
142 Vectashield (Vector Laboratories).

143

144 For smFISH, gonads were extruded, fixed, and hybridized with single molecule FISH probes as described  
145 (Lee et al., 2016). The *gfp* exon probe set contains 38 unique oligonucleotides labeled with CAL Fluor  
146 Red 610. Briefly, probes were dissolved in RNase-free TE buffer (10 mM Tris-HCl, 1 mM EDTA, pH 8.0)  
147 to create a 250  $\mu$ M probe stock. Mid-L4 stage animals were grown on OP50 for 24 hours, then dissected  
148 in PBS+0.1% Tween-20 + 0.25 mM levamisole. Animals were fixed in 4% paraformaldehyde for 20  
149 minutes, incubated at room temperature in PBS-T (PBS + 0.1% Tween-20) for 10-25 minutes, and  
150 equilibrated in smFISH wash buffer (30 mM sodium citrate pH 7.0, 300 mM NaCl, 1% formamide, 0.1%  
151 Tween-20, DEPC water) for 10-16 minutes. Samples were then incubated in hybridization buffer (30 mM  
152 sodium citrate pH 7.0, 300 mM NaCl, 1% formamide, 10% dextran sulfate w/v, DEPC water) plus 0.5  $\mu$ M  
153 smFISH probe at 37°C for 26-44 hours. 30 nM SNAP 549 ligand was added during the smFISH wash  
154 buffer + DAPI wash; samples were washed at 37°C for approximately 60 minutes. Finally, samples were  
155 resuspended in 12  $\mu$ L Antifade Prolong Gold mounting medium (Life Technologies), mounted on glass  
156 slides, and cured in a dark drawer for at least 24 hours before imaging.

157

158 Samples were imaged using a Leica SP8 scanning laser confocal microscope, taking 0.3  $\mu$ m (smFISH  
159 experiments) or 1  $\mu$ m (protein staining) slices in sequence. Maximum intensity partial stack projections  
160 were generated and brightness adjusted using ImageJ (Schindelin et al., 2015). All images were treated  
161 equally in ImageJ and Photoshop, with the exception of the transmitted light images. Imaging  
162 experiments were repeated at least twice with similar results, with the exception of PGL-1:SNAP: $\Delta$ N22  
163 K126E K129E worms.

## CRISPR-Cas9 guide RNAs and repair oligos

| Name                           | Type                      | Strain targeted              | mutation       | Sequence                                                                                                                                                                                                                                                                                                                                                                                                                                                                                                                                                                                                                                                                                                                           | Enzyme screen |
|--------------------------------|---------------------------|------------------------------|----------------|------------------------------------------------------------------------------------------------------------------------------------------------------------------------------------------------------------------------------------------------------------------------------------------------------------------------------------------------------------------------------------------------------------------------------------------------------------------------------------------------------------------------------------------------------------------------------------------------------------------------------------------------------------------------------------------------------------------------------------|---------------|
| <b>CRISPR-Cas9 guide RNAs:</b> |                           |                              |                |                                                                                                                                                                                                                                                                                                                                                                                                                                                                                                                                                                                                                                                                                                                                    |               |
| glh-1 sgRNA 1                  | CRISPR-Cas9 sgRNA plasmid | N2                           | 3xmyc          | target sequence: TCCACTACCGAATCCAGTTT                                                                                                                                                                                                                                                                                                                                                                                                                                                                                                                                                                                                                                                                                              |               |
| pgl-3 sgRNAin 1                | CRISPR-Cas9 sgRNA plasmid | N2                           | 3xV5           | target sequence: GCAACGGAACGTCTGGAAG                                                                                                                                                                                                                                                                                                                                                                                                                                                                                                                                                                                                                                                                                               |               |
| pgl-1 crRNA 1                  | CRISPR-Cas9 RNA           | N2                           | SNAP           | target sequence: cccaccagttcagcttatgg                                                                                                                                                                                                                                                                                                                                                                                                                                                                                                                                                                                                                                                                                              |               |
| pgl-1 crRNA 5                  | CRISPR-Cas9 RNA           | JK5687, JK5898, JK5874       | K126E<br>K129E | target sequence: gtcttcagctcttcagct                                                                                                                                                                                                                                                                                                                                                                                                                                                                                                                                                                                                                                                                                                |               |
| pgl-1 crRNA 8                  | CRISPR-Cas9 RNA           | JK5687                       | R123E          | target sequence: ctcttcagcttggccttac                                                                                                                                                                                                                                                                                                                                                                                                                                                                                                                                                                                                                                                                                               |               |
| SNAP crRNA 1                   | CRISPR-Cas9 RNA           | JK5687                       | ΔN22           | target sequence: CCTGGGCTGGGTCTGCAGG                                                                                                                                                                                                                                                                                                                                                                                                                                                                                                                                                                                                                                                                                               |               |
| <b>DNA repair template:</b>    |                           |                              |                |                                                                                                                                                                                                                                                                                                                                                                                                                                                                                                                                                                                                                                                                                                                                    |               |
| glh-1 3xmyc repair 1           | ssDNA repair oligo        | N2                           | 3xmyc          | ttccaccggtttattttgattaaaaactttatttcagCgAAAACCTGGAAA<br>CGAACAGAAGCTTATTTCCGAGGAAGACCTCGCCG<br>GAGAGCAAAGCTCATCTCTGAAGAGGATCTTGGAG<br>CCGAACAGAAGCTTATCTCTGAAGAAGACCTCGGAG<br>GATTCGGTAGTGGAGGCGGTTTCGGTGGTGGTAAC<br>AATGGAG                                                                                                                                                                                                                                                                                                                                                                                                                                                                                                        | n/a           |
| pgl-3 3xV5 repair 1            | ssDNA repair oligo        | N2                           | 3xV5           | agtttgccagcagcaacggaacCtcCggaCgaggcGGAAAGCCA<br>ATCCCAAACCCACTCCTCGGACTCGACTCCACCGG<br>AGGAAAGCCAATCCCAAACCCACTCCTCGGACTCG<br>ACTCCACCATCGGAAAGCCAATCCCAAACCCACTCC<br>TCGGACTCGACTCCACCGGA <del>t</del> cttatggaggtgctcgcggtgg<br>cgatcgt                                                                                                                                                                                                                                                                                                                                                                                                                                                                                          | BlnI          |
| pgl-1 SNAP                     | PCR product               | JK5687                       | SNAP           | ggattcgggtcaatttgcctccaccagttcagcttatggaAGTGGCGGTA<br>TGGACAAAGACTGCGAAATGAAGCGCACACCCTG<br>GATAGCCCTCTGGGCAAGCTGGAAGTGTCTGGGTG<br>CGAACAGGGCCTGCACCGTATCATCTTCTGGGCAA<br>AGGAACATCTGCCGCCGACGCCGTGGAAGTGCCTG<br>CCCCAGCCGCCGTGCTGGGCGGACCAGAGCCACT<br>GATGCAGGCCACCGCCTGGCTCAACGCCTACTTTC<br>ACCAGCCTGAGGCCATCGAGGAGTTCCCTGTGCCA<br>GCCCTGCACCACCCAGTGTCCAGCAGGAGAGCTT<br>TACCCGCCAGGTGCTGTGGAAACTGCTGAAAGTGG<br>TGAAGTTCGGAGAGGTCATCAGCTACAGCCACCTG<br>GCCGCCCTGGCCGCAATCCCGCCGCCACCGCCG<br>CCGTGAAAACCGCCCTGAGCGGAAATCCCGTCCCC<br>ATTCTGATCCCCTGCCACCGGGTGGTGCAGGGCGA<br>CCTGGACGTGGGGGGCTACGAGGGCGGGCTCGCC<br>GTGAAAGAGTGGCTGCTGGCCCACGAGGGCCACA<br>GACTGGGCAAGCCTGGGCTGGGTCTGCAGGCGG<br>ATCCgaggaggtgctcgaggatgctggtgagaccgtg | n/a           |
| K126E<br>K129E<br>repair       | ssDNA repair oligo        | JK5687,<br>JK5898,<br>JK5874 | K126E<br>K129E | tcgatgacgacaagaagctcggaatgctgccgtaaggcTGagctgaa<br>gGagactgaagcgttaagattctcaagctctctcaagt                                                                                                                                                                                                                                                                                                                                                                                                                                                                                                                                                                                                                                          | BlnI          |
| pgl-1 R123E<br>repair          | ssDNA repair oligo        | JK5687                       | R123E          | ttctgtcatcgatgacgacaagaagctcggaatgctcgcTGAGaaggcc<br>aagctgaagaagactgaagcgttaagattctc                                                                                                                                                                                                                                                                                                                                                                                                                                                                                                                                                                                                                                              | HpyAV         |



165 **References**

- 166 Aoki, S.T., Kershner, A.M., Bingman, C.A., Wickens, M., and Kimble, J. (2016). PGL germ  
167 granule assembly protein is a base-specific, single-stranded RNase. *Proc Natl Acad Sci USA*  
168 *113*, 1279-1284.
- 169 Arnau, J., Lauritzen, C., Petersen, G.E., and Pedersen, J. (2006). Current strategies for the use  
170 of affinity tags and tag removal for the purification of recombinant proteins. *Protein Expr Purif*  
171 *48*, 1-13.
- 172 Arribere, J.A., Bell, R.T., Fu, B.X., Artiles, K.L., Hartman, P.S., and Fire, A.Z. (2014). Efficient  
173 marker-free recovery of custom genetic modifications with CRISPR/Cas9 in *Caenorhabditis*  
174 *elegans*. *Genetics* *198*, 837-846.
- 175 Brenner, S. (1974). The genetics of *Caenorhabditis elegans*. *Genetics* *77*, 71-94.
- 176 Crittenden, S.L., Seidel, H.S., and Kimble, J. (2017). Analysis of the *C. elegans* germline stem  
177 cell pool. *Methods Mol Biol* *1463*, 1-33.
- 178 Gibson, D.G. (2011). Enzymatic assembly of overlapping DNA fragments. *Methods Enzymol*  
179 *498*, 349-361.
- 180 Keppler, A., Gendreizig, S., Gronemeyer, T., Pick, H., Vogel, H., and Johnsson, K. (2003). A  
181 general method for the covalent labeling of fusion proteins with small molecules *in vivo*. *Nat*  
182 *Biotechnol* *21*, 86-89.
- 183 Lee, C., Sorensen, E.B., Lynch, T.R., and Kimble, J. (2016). *C. elegans* GLP-1/Notch activates  
184 transcription in a probability gradient across the germline stem cell pool. *Elife* *5*, e18370.
- 185 Paix, A., Folkmann, A., Rasoloson, D., and Seydoux, G. (2015). High efficiency, homology-  
186 directed genome editing in *Caenorhabditis elegans* using CRISPR-Cas9 ribonucleoprotein  
187 complexes. *Genetics* *201*, 47-54.
- 188 Schindelin, J., Rueden, C.T., Hiner, M.C., and Eliceiri, K.W. (2015). The ImageJ ecosystem: An  
189 open platform for biomedical image analysis. *Mol Reprod Dev* *82*, 518-529.

190
